# Supplementary material for: A solvent- and catalyst-free domino reaction for the efficient synthesis of 3-arylthiazolidine-2-thiones under microwave irradiation
Source: Royal Society of Chemistry journal article supplement (doi:10.1039/c5ra19112b), 2015-01-01
Supplement: c5ra19112b1.pdf [file c5ra19112b1.pdf]

## A solvent- and catalyst-free domino reaction for the efficient synthesis of 3-aryltiazolidine-2-thiones under microwave irradiation

Sundaravel Vivek Kumar, Shanmugam Muthusubramanian and Subbu Perumal\*

Department of Organic Chemistry, School of Chemistry, Madurai Kamaraj University,  
Madurai – 625021, Tamil Nadu, India

### Supporting Information

#### Structure determination using NMR spectroscopic data of **3e**

The structure of 4-hydroxy-3-(*p*-tolyl)thiazolidine-2-thione **3e** was deduced from one- and two-dimensional NMR spectroscopic data. The structural elucidation using NMR spectroscopy is discussed below.

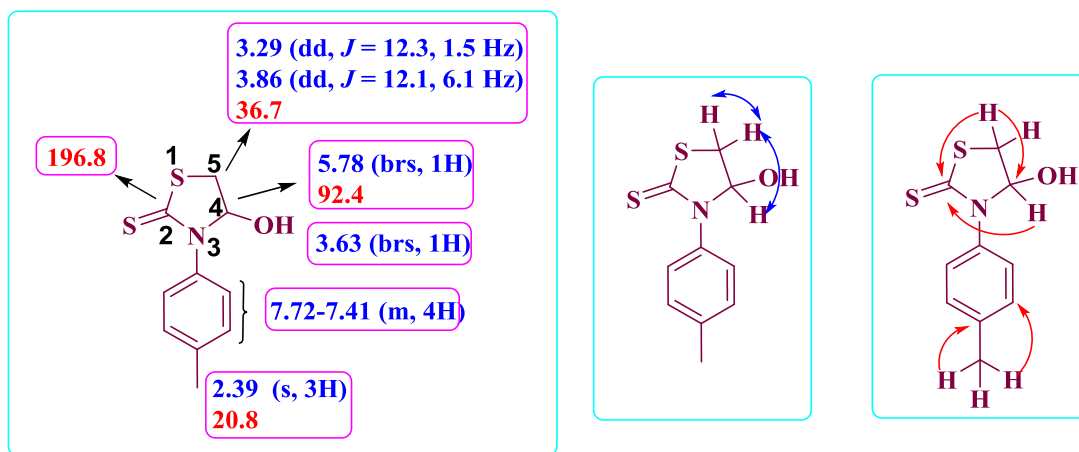

In the  $^1\text{H}$  NMR spectrum of **3e**, the H-5 hydrogens appear as a broad singlet 5.78 ppm and it shows a C-H COSY correlation with the carbon signal at 92.4 ppm. Further, the H-5 have a H-H COCY correlation with a hydrogen at 3.86 ppm ( $J = 12.1, 6.1$  Hz) assignable to H-4a. Moreover, the H-5 protons show a HMB correlation with C-2 at 196.8 ppm. The diastereotopic protons, H-4 appear as doublets of doublets at 3.86 ppm ( $J = 12.1, 6.1$  Hz) and 3.29 ( $J = 12.3, 1.5$  Hz) which show HMBCs with C-2 and C-4 at 196.8 and 92.4 ppm respectively. The H-H COSY correlation reveals that one of the diastereotopic H-4a protons couples with H-5 proton and the protons, H-

4a and H-4b couple with each other. The hydrogens, H-4a and H-4b show a C-H COSY correlation with the carbon signal at 36.7 ppm.

The aromatic protons appear as a multiplet at 7.72-7.41 ppm. The methyl hydrogens appear as a singlet at 2.39 ppm which show HMBs with C-3' and C-4' at 127.8 and 136.7 ppm respectively. The hemiaminalic OH appears as a broad singlet at 3.63 ppm. The >C=S carbon appears at 196.8 ppm, which is a characteristic carbon signal for the 4-hydroxy-3-arylthiazolidine-2-thione system. Finally the structure of the product was also confirmed by ESI mass analysis.

| <b>No.</b> | <b>List of Figures</b>                    | <b>Page</b> |
|------------|-------------------------------------------|-------------|
| 1          | <sup>1</sup> H NMR Spectrum <b>3a</b>     | 06          |
| 2          | <sup>13</sup> C NMR Spectrum of <b>3a</b> | 06          |
| 3          | ESI mass spectrum of <b>3a</b>            | 07          |
| 4          | <sup>1</sup> H NMR Spectrum <b>3b</b>     | 07          |
| 5          | <sup>13</sup> C NMR Spectrum of <b>3b</b> | 08          |
| 6          | ESI mass spectrum of <b>3b</b>            | 08          |
| 7          | <sup>1</sup> H NMR Spectrum <b>3c</b>     | 09          |
| 8          | <sup>13</sup> C NMR Spectrum of <b>3c</b> | 09          |
| 9          | ESI mass spectrum of <b>3c</b>            | 10          |
| 10         | <sup>1</sup> H NMR Spectrum <b>3d</b>     | 10          |
| 11         | <sup>13</sup> C NMR Spectrum of <b>3d</b> | 11          |
| 12         | ESI mass spectrum of <b>3d</b>            | 11          |
| 13         | <sup>1</sup> H NMR Spectrum <b>3e</b>     | 12          |
| 14         | <sup>13</sup> C NMR Spectrum of <b>3e</b> | 12          |
| 15         | DEPT Spectrum of <b>3e</b>                | 13          |
| 16         | H, H-COSY Spectrum of <b>3e</b>           | 13          |
| 17         | HMBC Spectrum of <b>3e</b>                | 14          |
| 18         | ESI mass spectrum of <b>3e</b>            | 14          |
| 19         | <sup>1</sup> H NMR Spectrum <b>3f</b>     | 15          |
| 20         | <sup>13</sup> C NMR Spectrum of <b>3f</b> | 15          |
| 21         | ESI mass spectrum of <b>3f</b>            | 16          |
| 22         | <sup>1</sup> H NMR Spectrum <b>3g</b>     | 16          |
| 23         | <sup>13</sup> C NMR Spectrum of <b>3g</b> | 17          |
| 24         | ESI mass spectrum of <b>3g</b>            | 17          |
| 25         | <sup>1</sup> H NMR Spectrum <b>3h</b>     | 18          |
| 26         | <sup>13</sup> C NMR Spectrum of <b>3h</b> | 18          |

|    |                                           |    |
|----|-------------------------------------------|----|
| 27 | ESI mass spectrum of <b>3h</b>            | 19 |
| 28 | <sup>1</sup> H NMR Spectrum <b>3i</b>     | 19 |
| 29 | <sup>13</sup> C NMR Spectrum of <b>3i</b> | 20 |
| 30 | ESI mass spectrum of <b>3i</b>            | 20 |
| 31 | <sup>1</sup> H NMR Spectrum <b>3j</b>     | 21 |
| 32 | <sup>13</sup> C NMR Spectrum of <b>3j</b> | 21 |
| 33 | ESI mass spectrum of <b>3j</b>            | 22 |
| 34 | <sup>1</sup> H NMR Spectrum <b>3k</b>     | 22 |
| 35 | <sup>13</sup> C NMR Spectrum of <b>3k</b> | 23 |
| 36 | ESI mass spectrum of <b>3k</b>            | 23 |
| 37 | <sup>1</sup> H NMR Spectrum <b>3l</b>     | 24 |
| 38 | <sup>13</sup> C NMR Spectrum of <b>3l</b> | 24 |
| 39 | ESI mass spectrum of <b>3l</b>            | 25 |
| 40 | <sup>1</sup> H NMR Spectrum <b>3m</b>     | 25 |
| 41 | <sup>13</sup> C NMR Spectrum of <b>3m</b> | 26 |
| 42 | <sup>1</sup> H NMR Spectrum <b>5a</b>     | 26 |
| 43 | <sup>13</sup> C NMR Spectrum of <b>5a</b> | 27 |
| 44 | <sup>1</sup> H NMR Spectrum <b>5b</b>     | 27 |
| 45 | <sup>13</sup> C NMR Spectrum of <b>5b</b> | 28 |
| 46 | <sup>1</sup> H NMR Spectrum <b>5c</b>     | 28 |
| 47 | <sup>13</sup> C NMR Spectrum of <b>5c</b> | 29 |
| 48 | ESI mass spectrum of <b>5c</b>            | 29 |
| 49 | <sup>1</sup> H NMR Spectrum <b>6a</b>     | 30 |
| 50 | <sup>13</sup> C NMR Spectrum of <b>6a</b> | 30 |
| 51 | ESI mass spectrum of <b>6a</b>            | 31 |

|    |                                           |    |
|----|-------------------------------------------|----|
| 52 | <sup>1</sup> H NMR Spectrum <b>6b</b>     | 31 |
| 53 | <sup>13</sup> C NMR Spectrum of <b>6b</b> | 32 |
| 54 | ESI mass spectrum of <b>6b</b>            | 32 |
| 55 | <sup>1</sup> H NMR Spectrum <b>6c</b>     | 33 |
| 56 | <sup>13</sup> C NMR Spectrum of <b>6c</b> | 33 |
| 57 | ESI mass spectrum of <b>6c</b>            | 34 |
| 58 | <sup>1</sup> H NMR Spectrum <b>6d</b>     | 34 |
| 59 | <sup>13</sup> C NMR Spectrum of <b>6d</b> | 35 |
| 60 | ESI mass spectrum of                      | 35 |
| 61 | <sup>1</sup> H NMR Spectrum <b>6e</b>     | 36 |
| 62 | <sup>13</sup> C NMR Spectrum of <b>6e</b> | 36 |

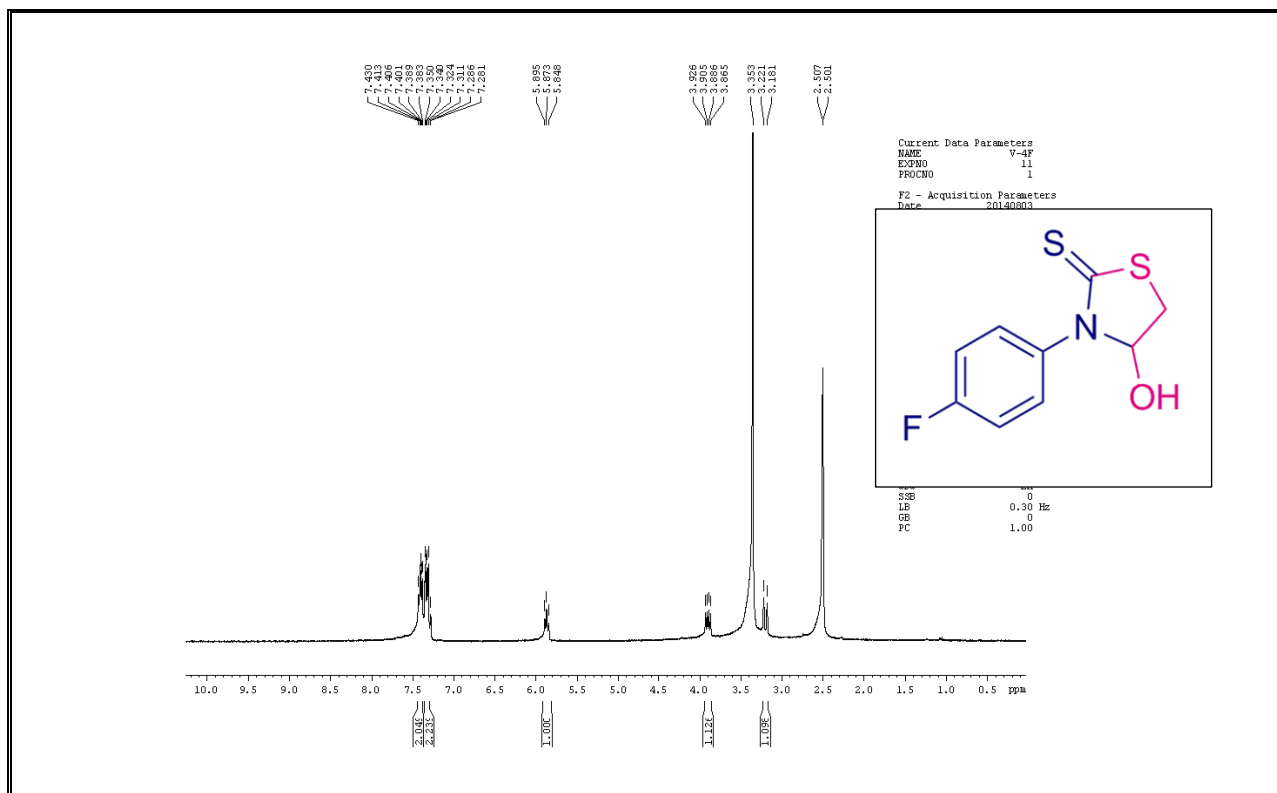

Fig.1 <sup>1</sup>H NMR Spectrum 3a(DMSO-d<sub>6</sub>)

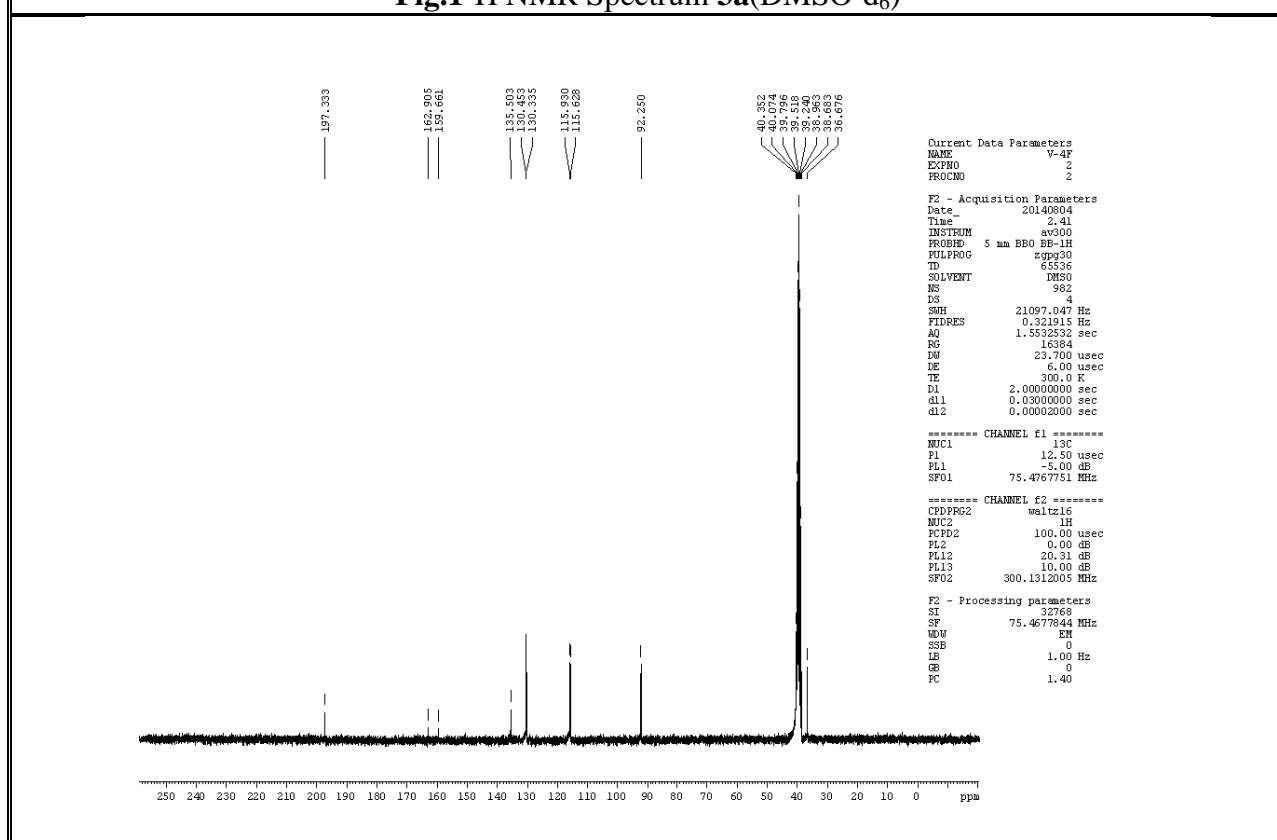

Fig.2 <sup>13</sup>C NMR Spectrum of 3a(DMSO-d<sub>6</sub>)

V-1\_140812233707 #49 RT: 0.60 AV: 1 NL: 4.05E1  
T: ITMS + c ESI Full ms [150.00-1000.00]

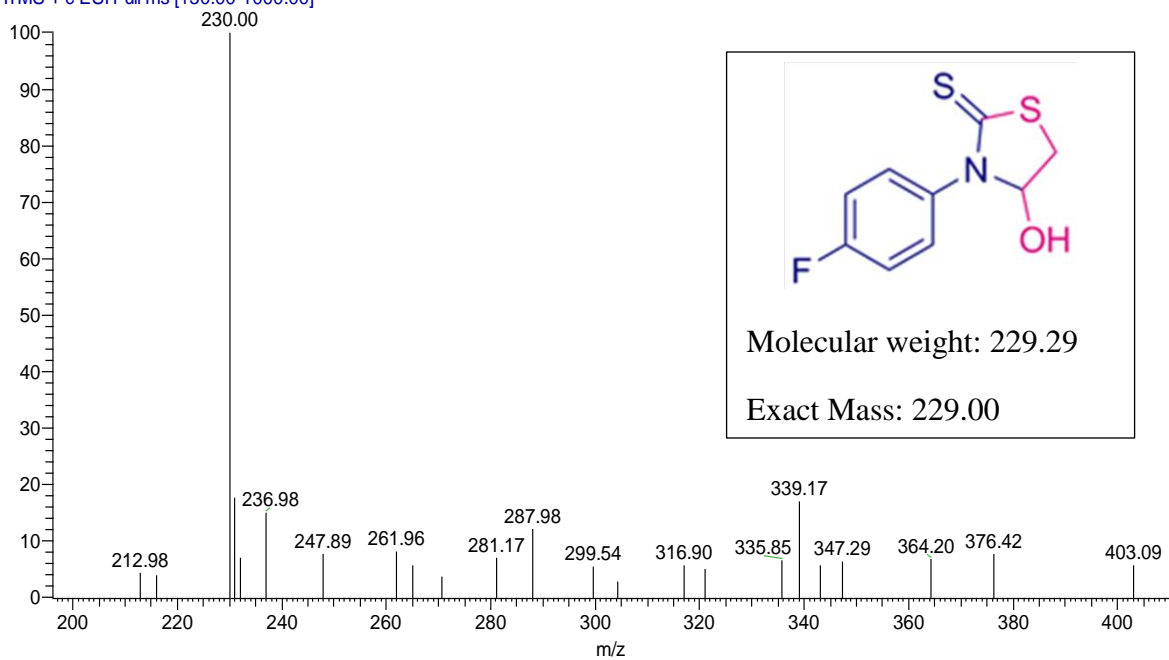

Fig.3 ESI mass spectrum of 3a

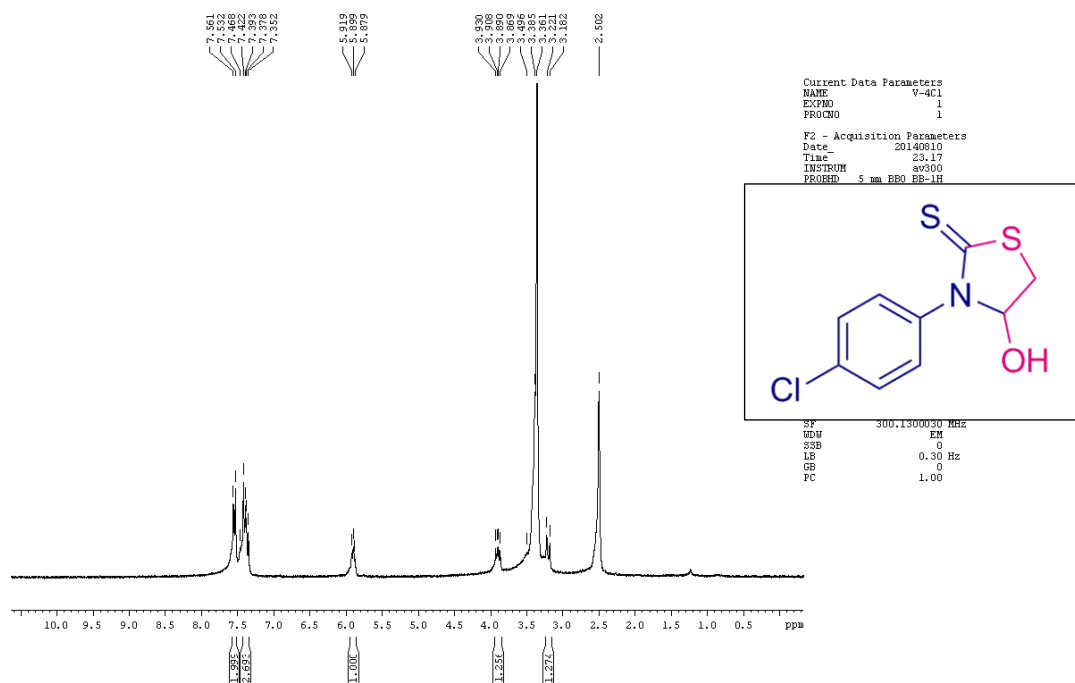

Fig.4 <sup>1</sup>H NMR Spectrum 3b(DMSO-d<sub>6</sub>)

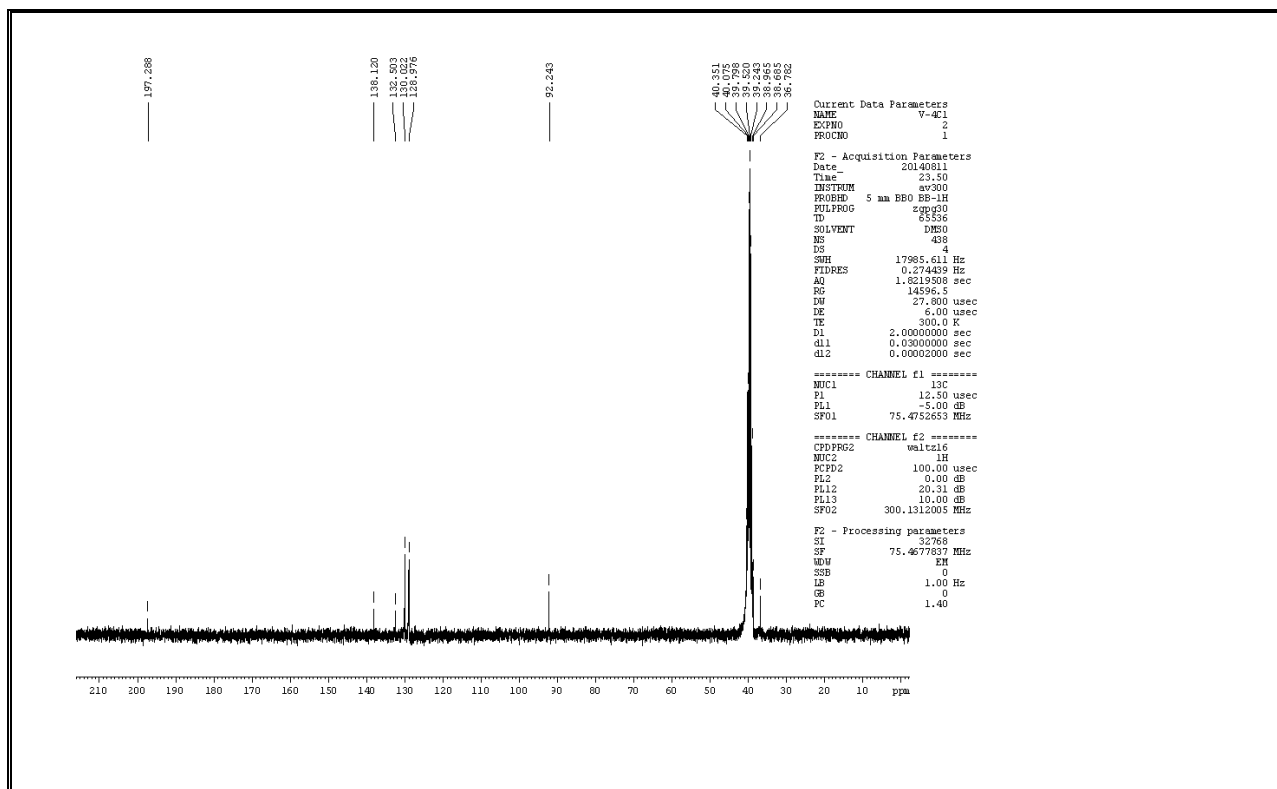

**Fig.5**  $^{13}\text{C}$  NMR Spectrum of **3b**(DMSO- $d_6$ )

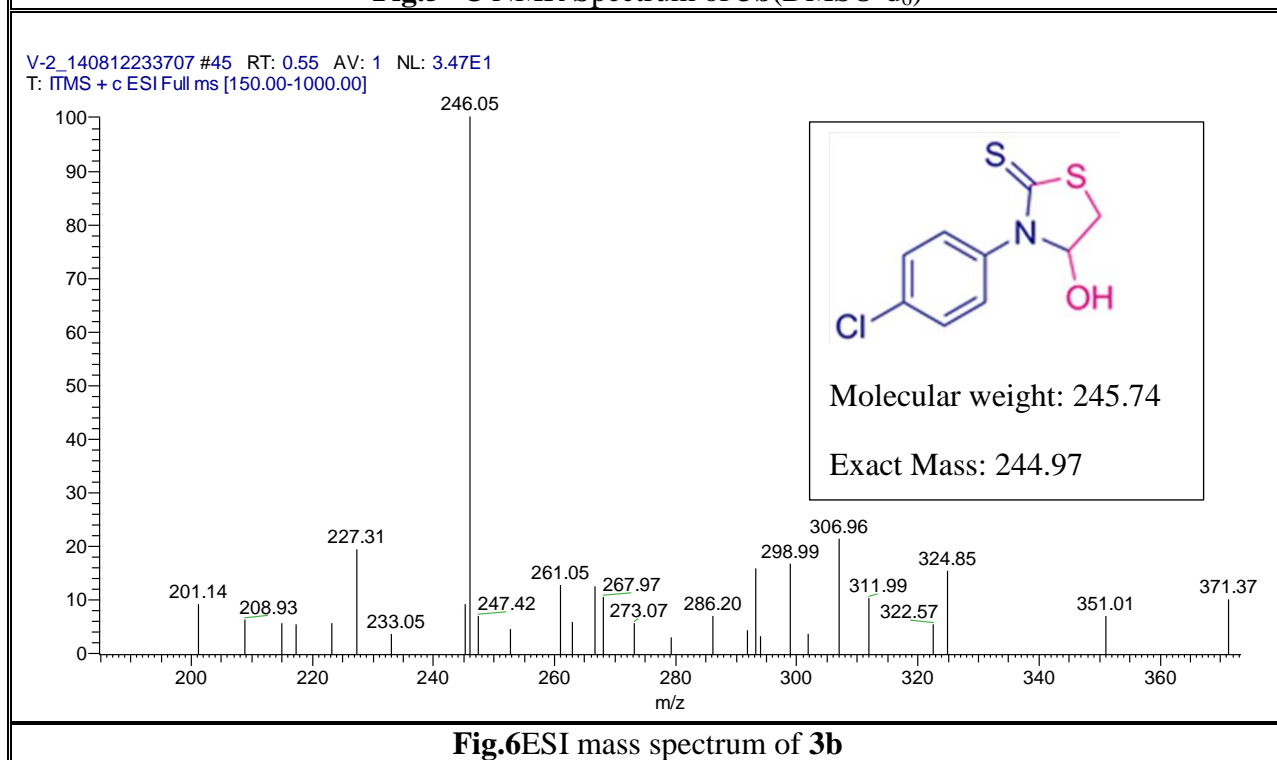

**Fig.6** ESI mass spectrum of **3b**



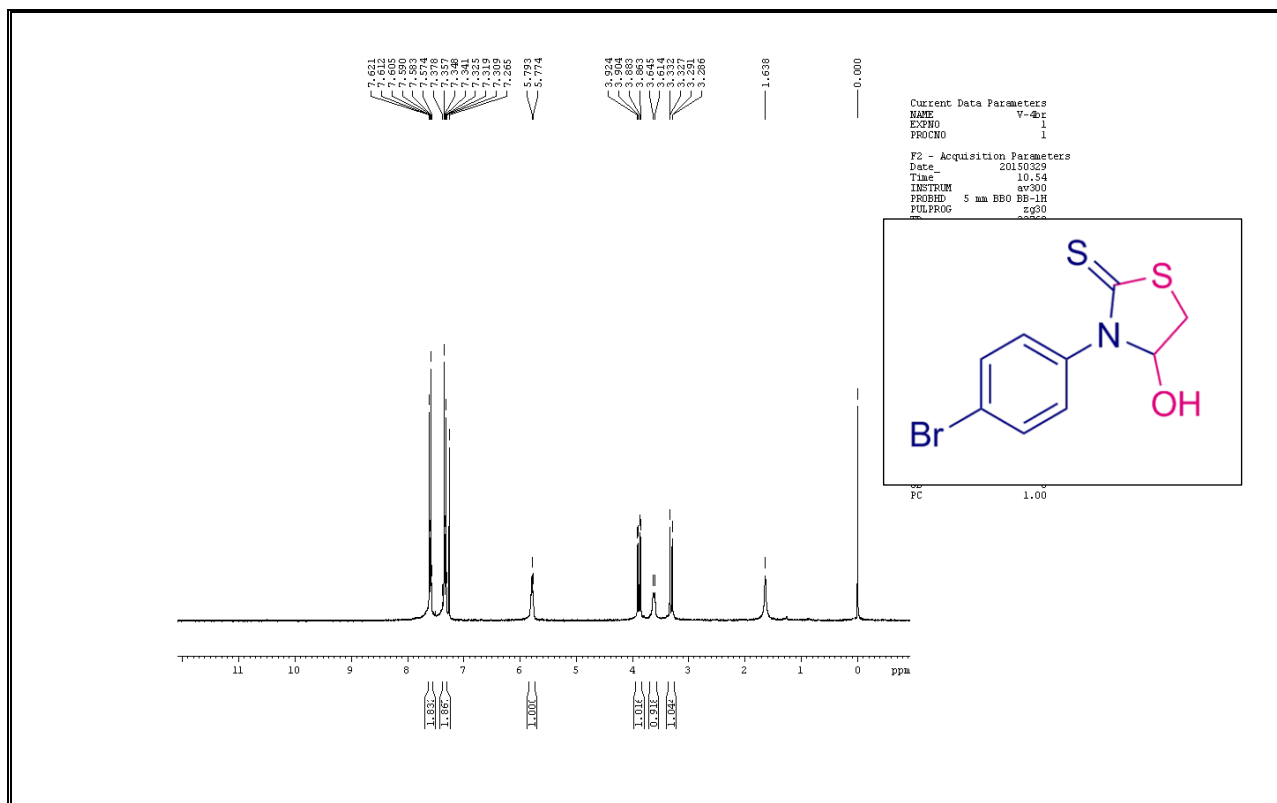

Fig.7  $^1\text{H}$  NMR Spectrum **3c**( $\text{CDCl}_3$ )

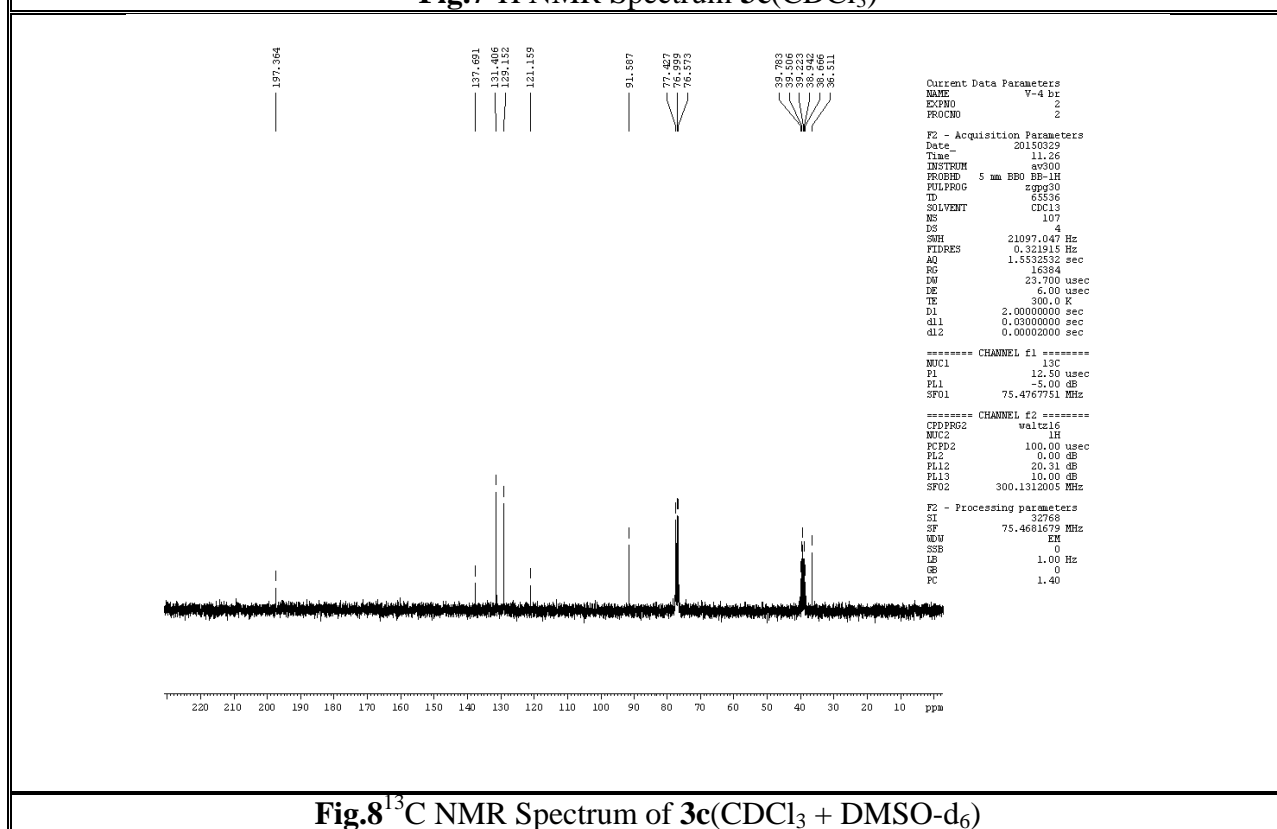

Fig.8  $^{13}\text{C}$  NMR Spectrum of **3c**( $\text{CDCl}_3 + \text{DMSO-d}_6$ )

4BR #16 RT: 0.20 AV: 1 NL: 5.74E2  
T: ITMS - c ESI Full ms [50.00-1000.00]

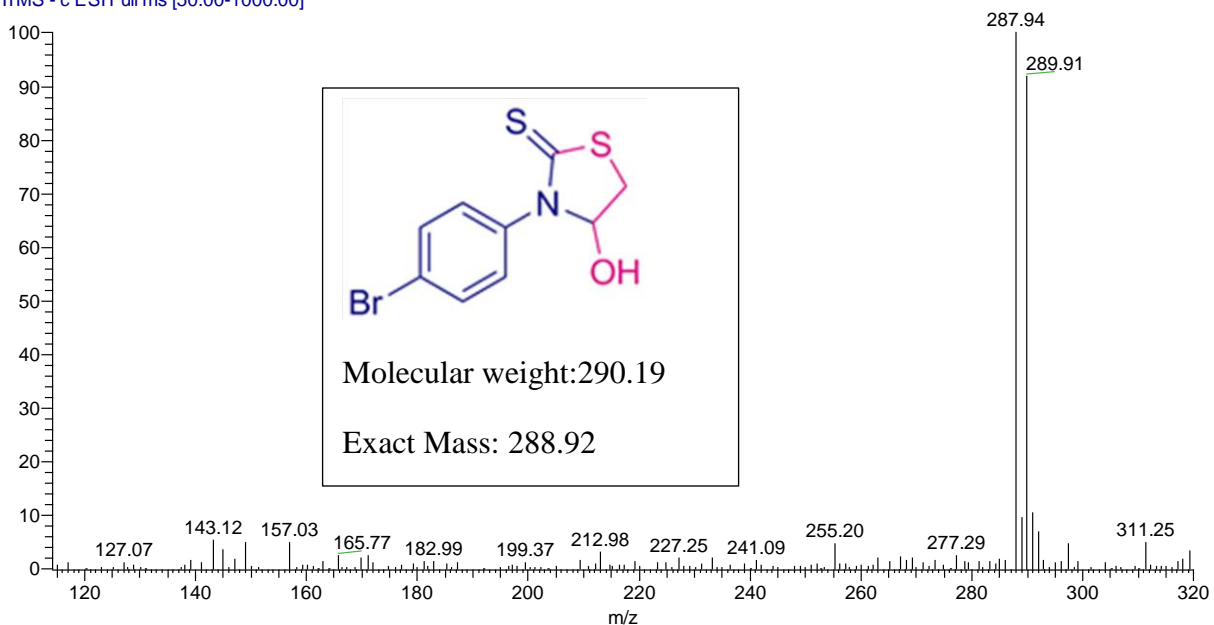

Fig.9 ESI mass spectrum of 3c

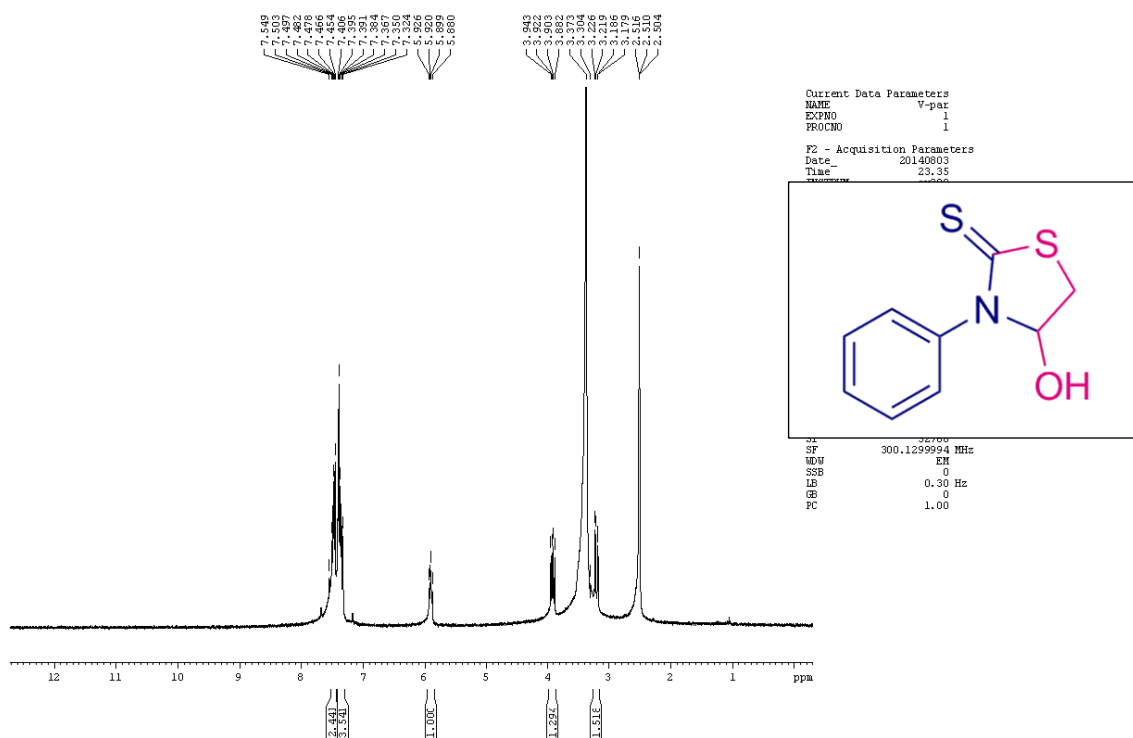

Fig.10 <sup>1</sup>H NMR Spectrum 3d(DMSO-d<sub>6</sub>)

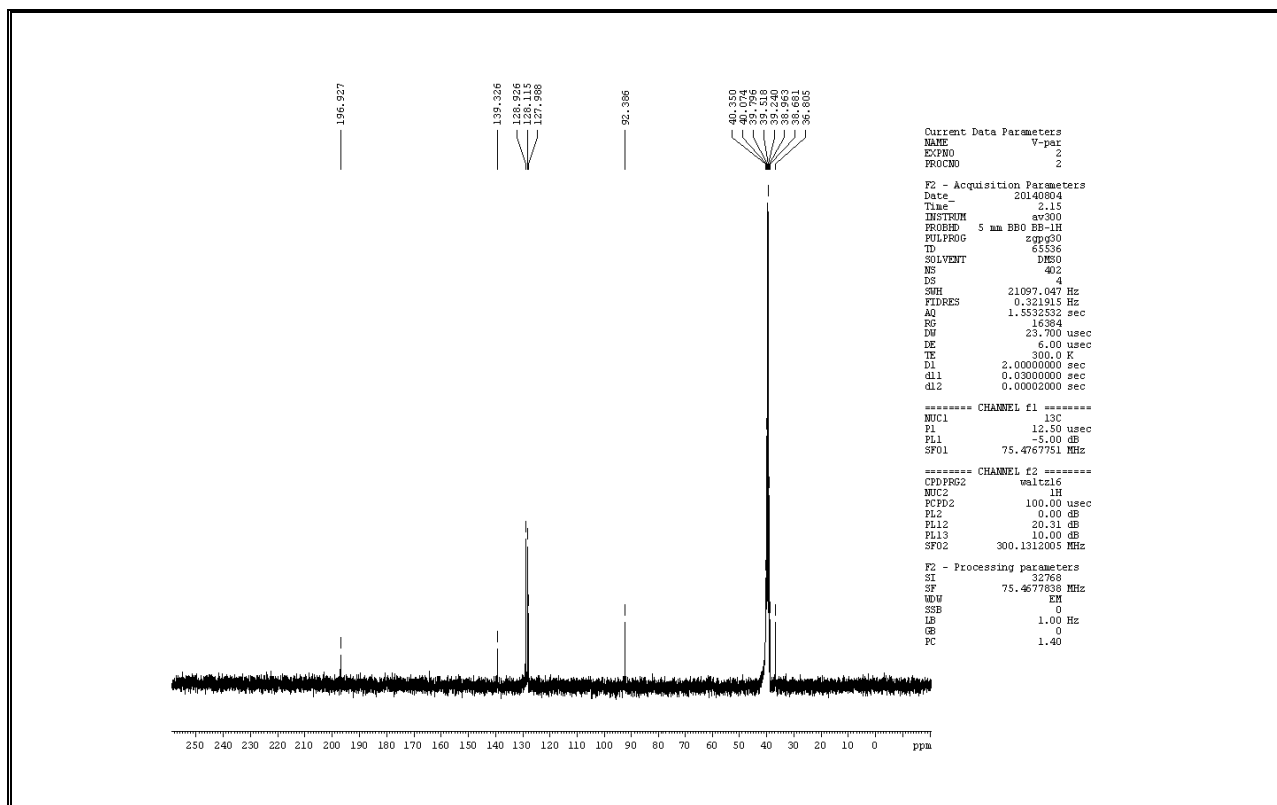

**Fig.11**  $^{13}\text{C}$  NMR Spectrum of **3d**(DMSO- $\text{d}^6$ )

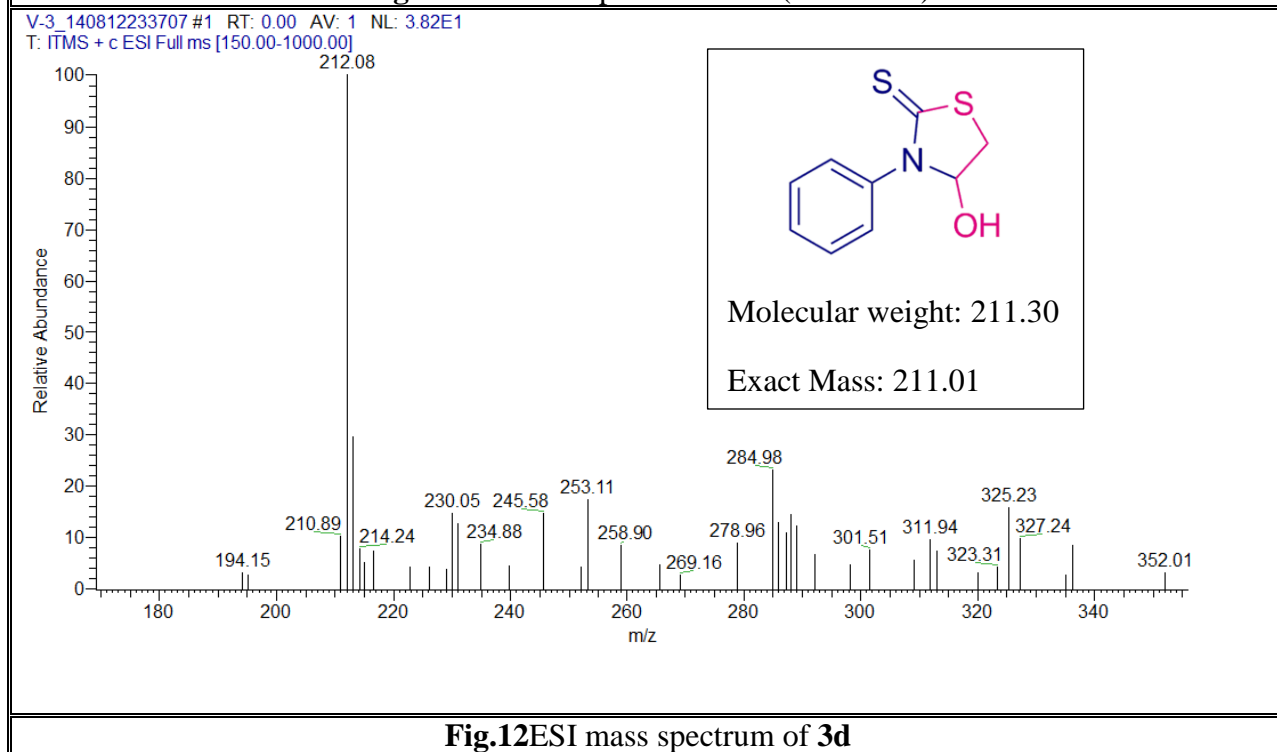

**Fig.12**ESI mass spectrum of **3d**

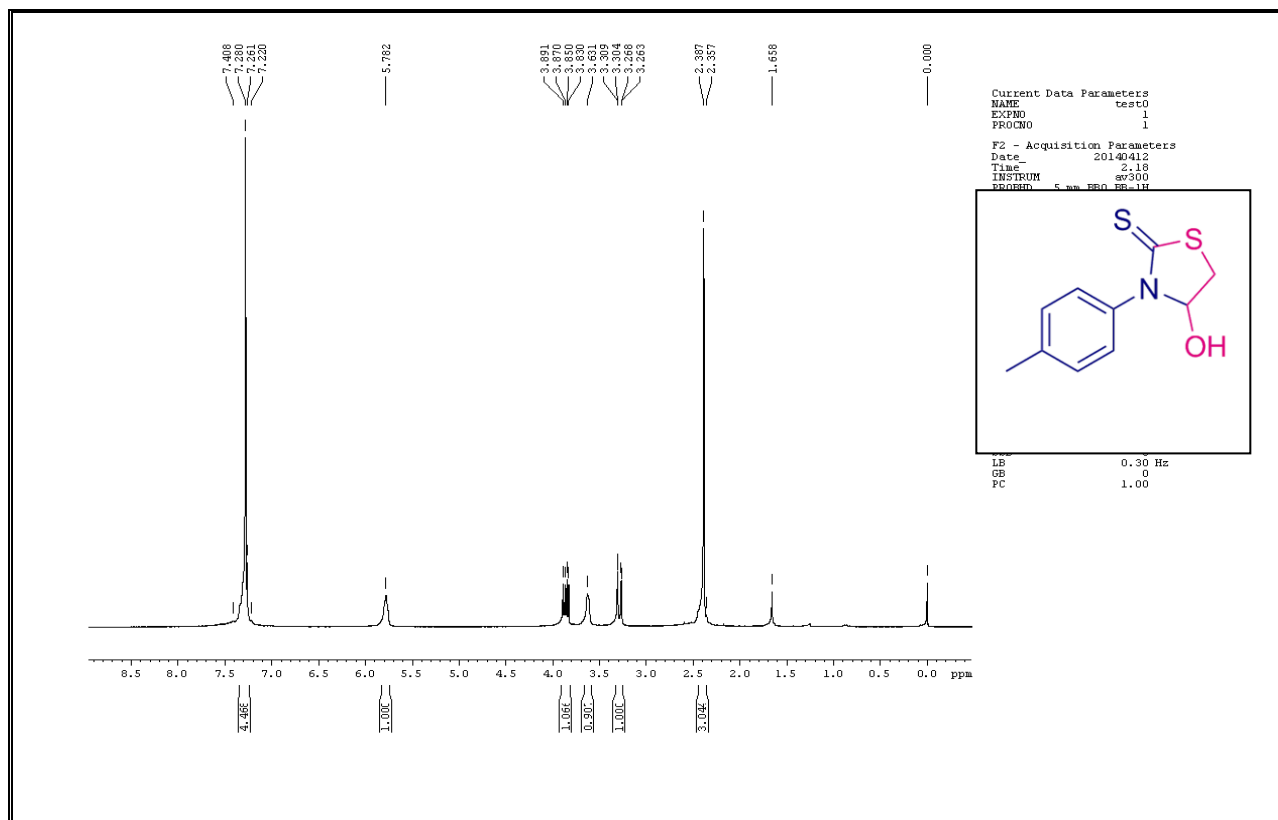

Fig.13  $^1\text{H}$  NMR Spectrum **3e**( $\text{CDCl}_3$ )

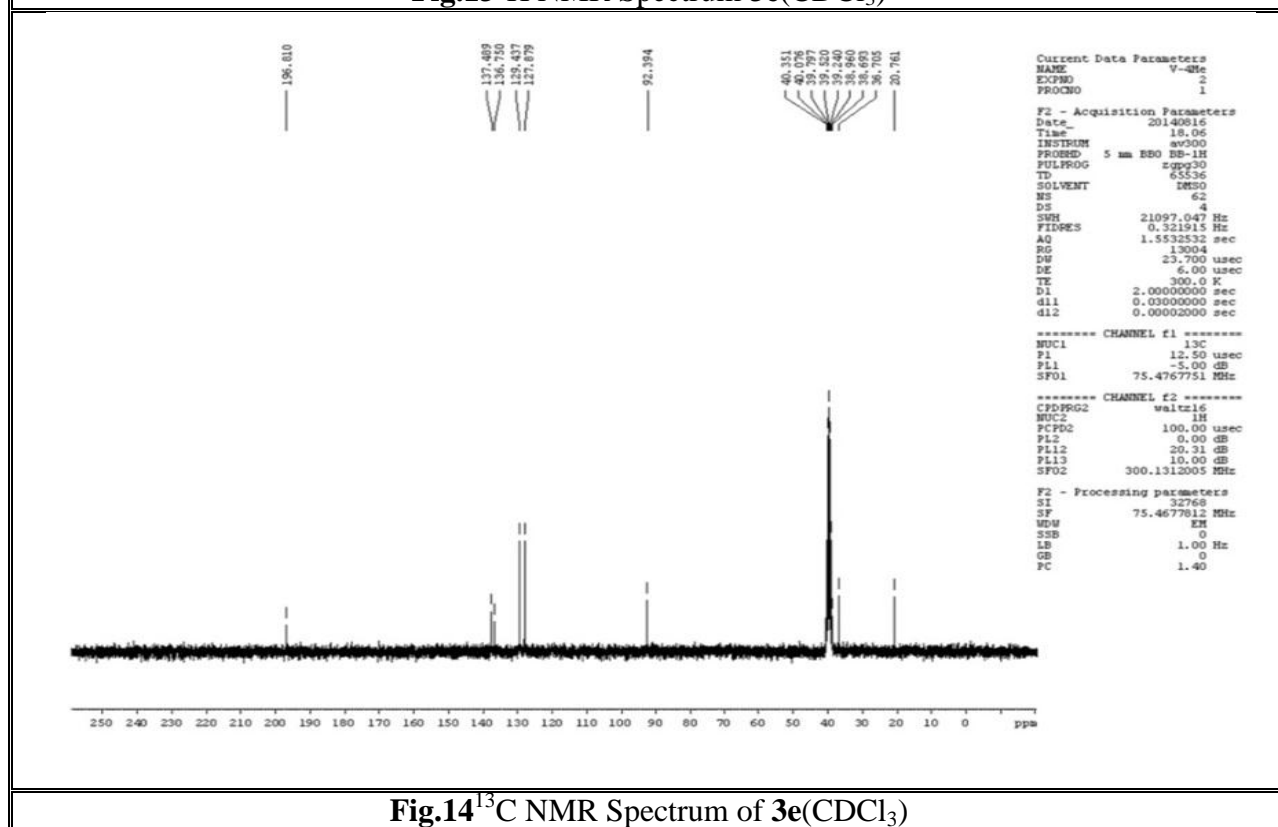

Fig.14  $^{13}\text{C}$  NMR Spectrum of **3e**( $\text{CDCl}_3$ )

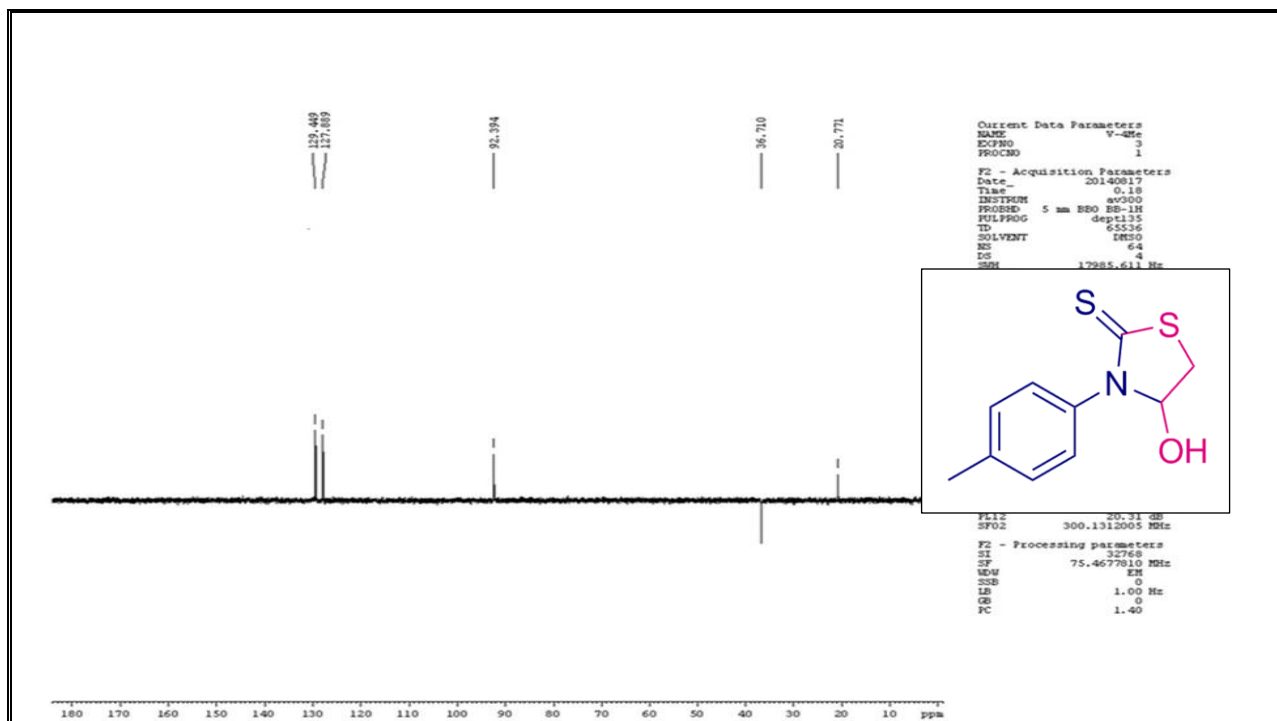

Fig.15 DEPT Spectrum of 3c (CDCl<sub>3</sub>)

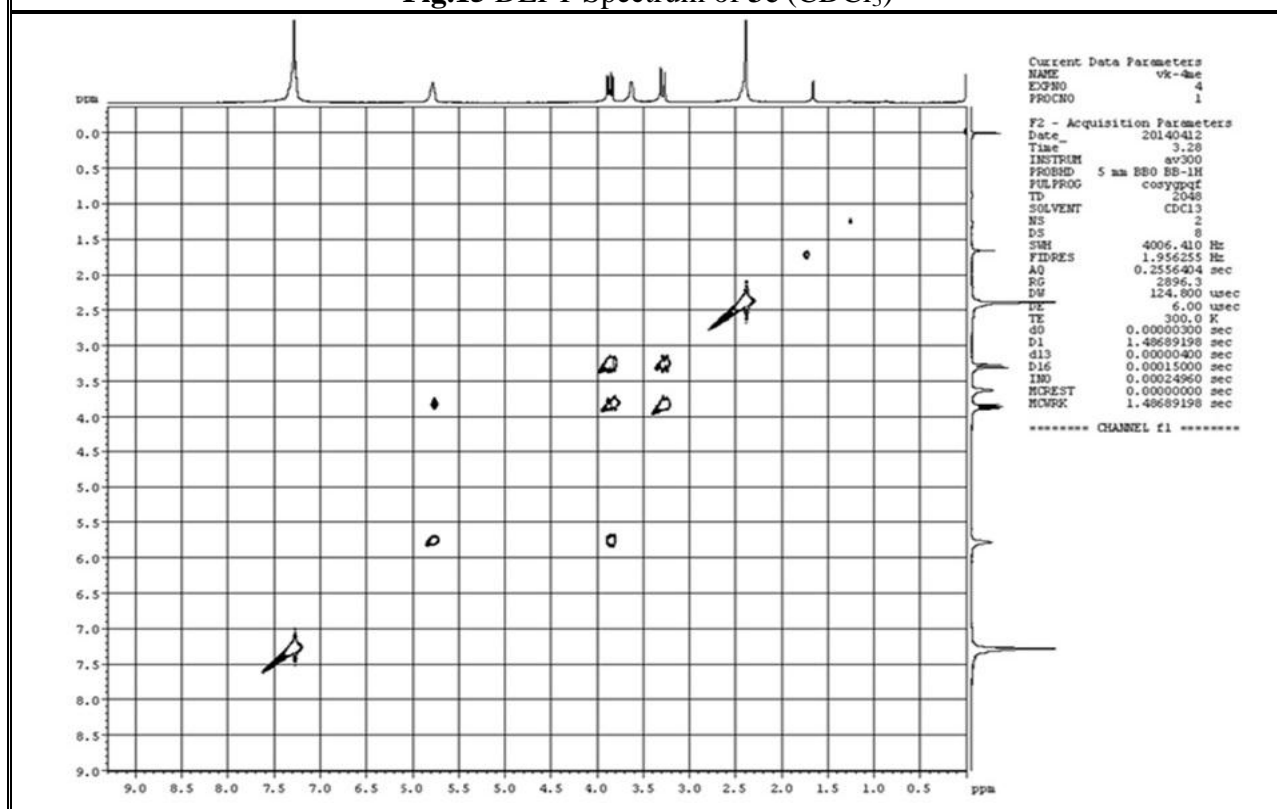

Fig.16 H, H-COSY Spectrum of 3c(CDCl<sub>3</sub>)

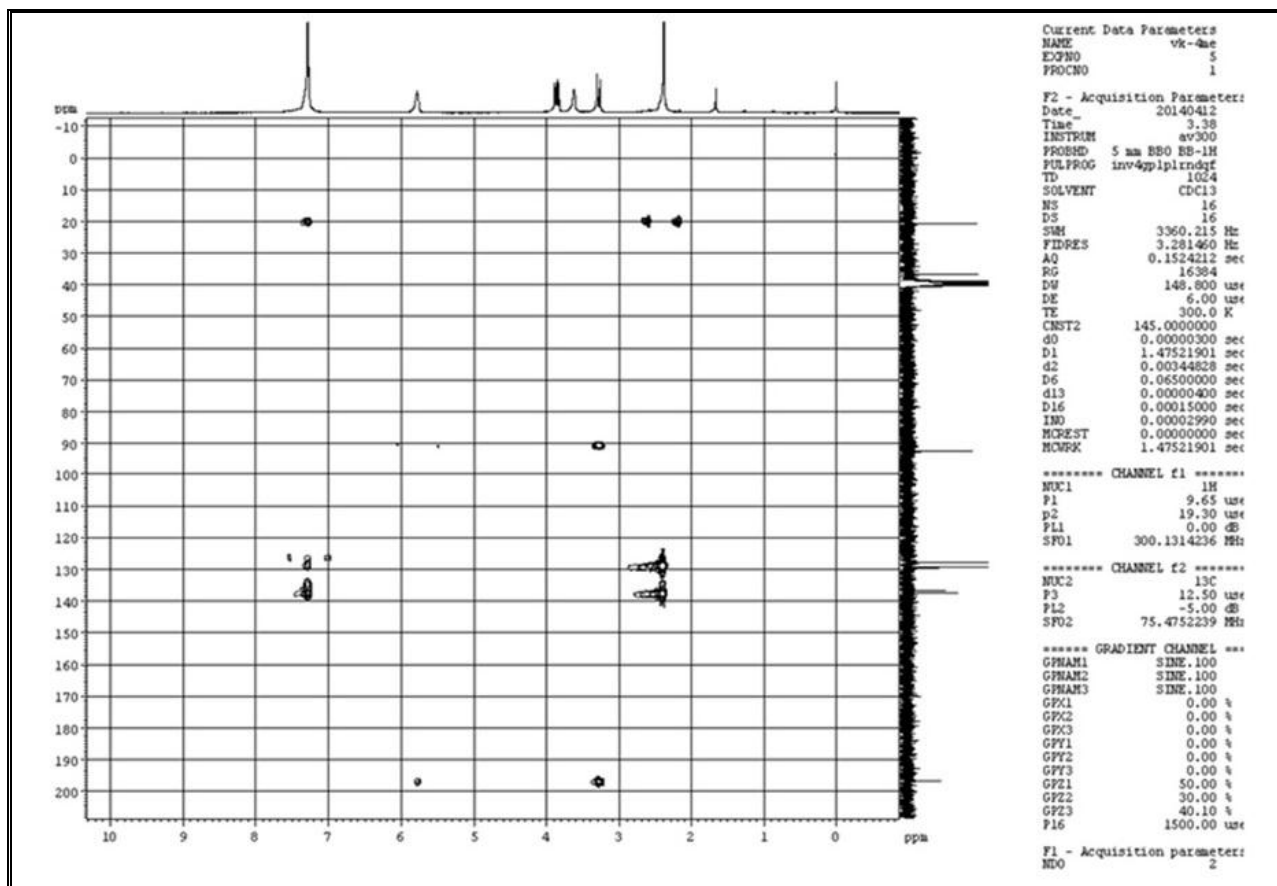

Fig.17 HMBC Spectrum of 3c (CDCl<sub>3</sub>)

V-4\_140812233707 #1 RT: 0.00 AV: 1 NL: 7.16E1  
T: ITMS + c ESI Full ms [150.00-1000.00]

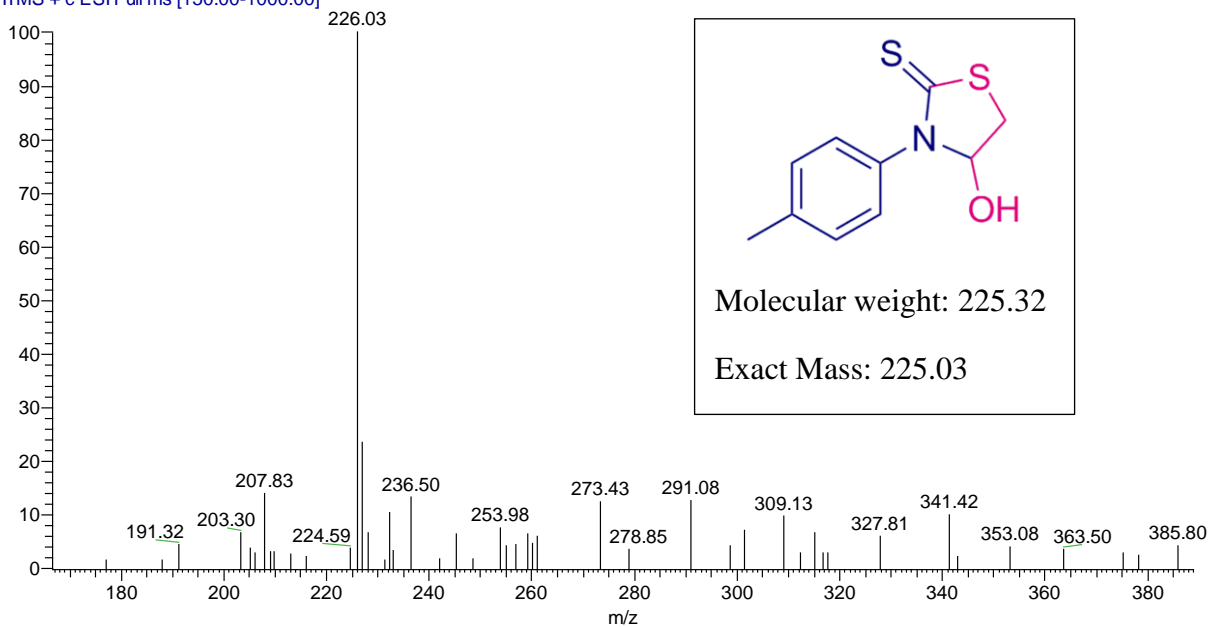

Fig.18ESI mass spectrum of 3e

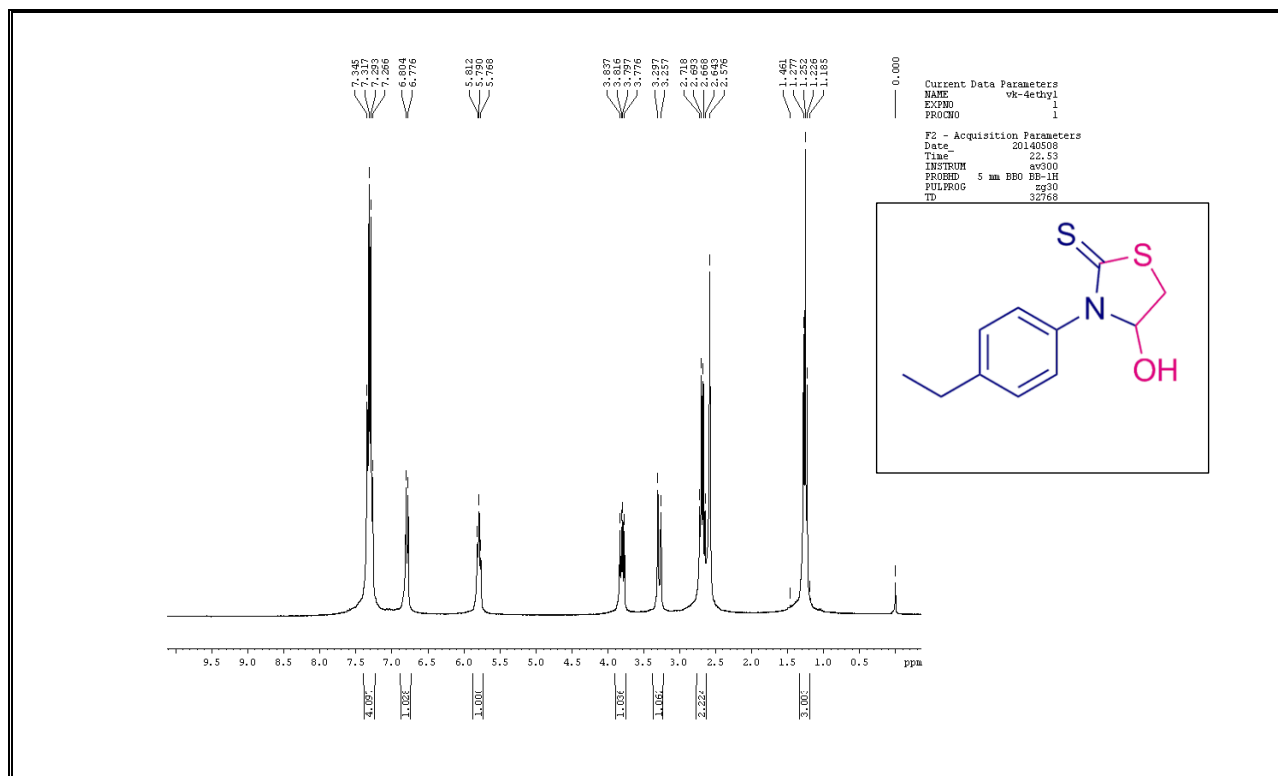

Fig.19  $^1\text{H}$  NMR Spectrum 3f(CDCl<sub>3</sub> + DMSO-d<sub>6</sub>)

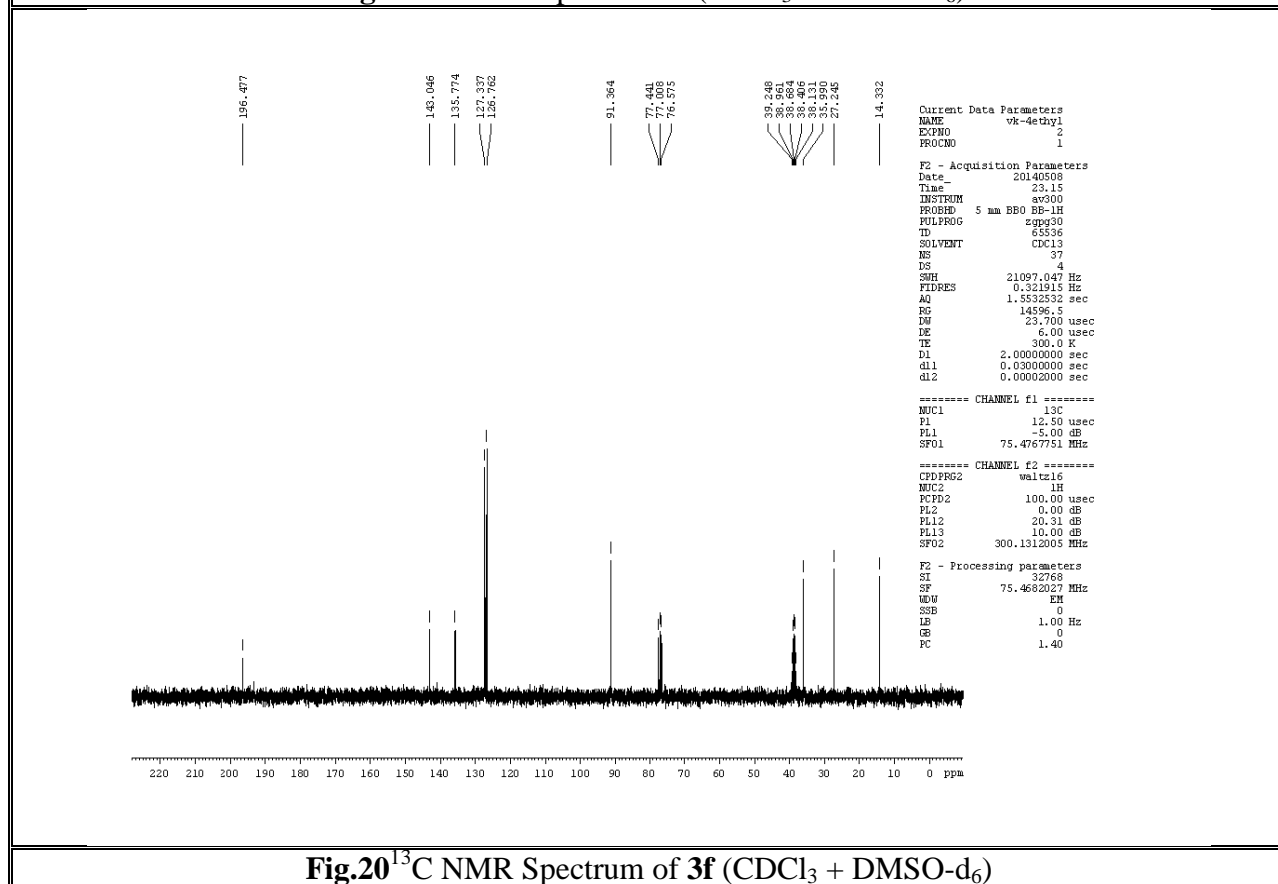

Fig.20  $^{13}\text{C}$  NMR Spectrum of 3f (CDCl<sub>3</sub> + DMSO-d<sub>6</sub>)

V-5\_140812233707 #1 RT: 0.00 AV: 1 NL: 1.59E2  
T: ITMS + c ESI Full ms [150.00-1000.00]

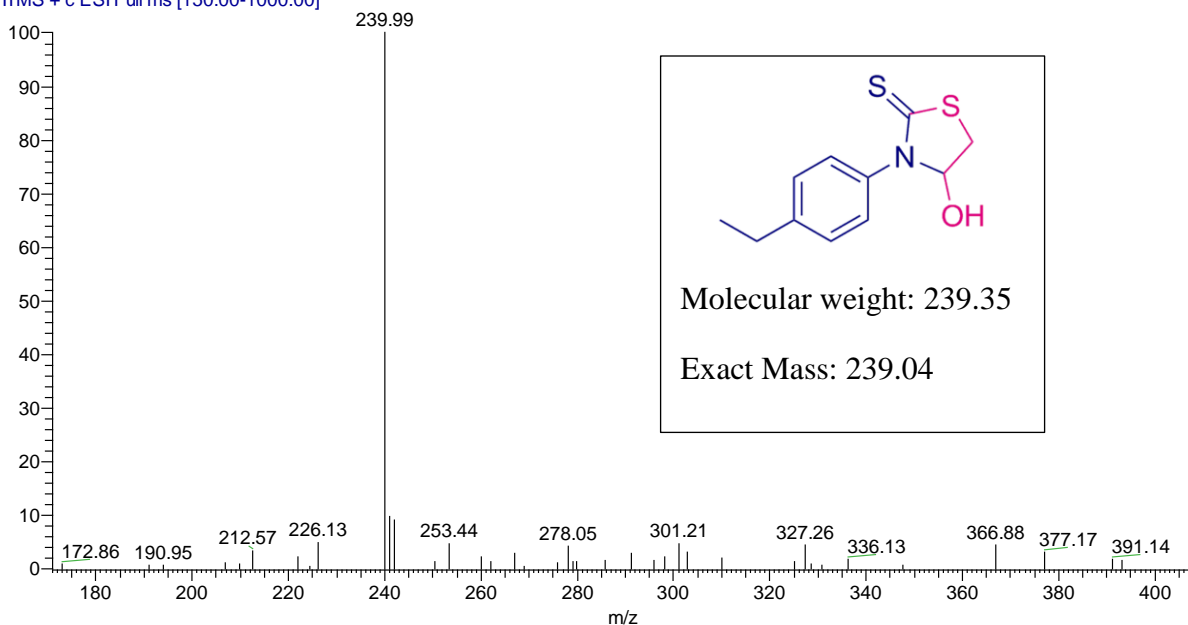

Fig.21 ESI mass spectrum of 3f

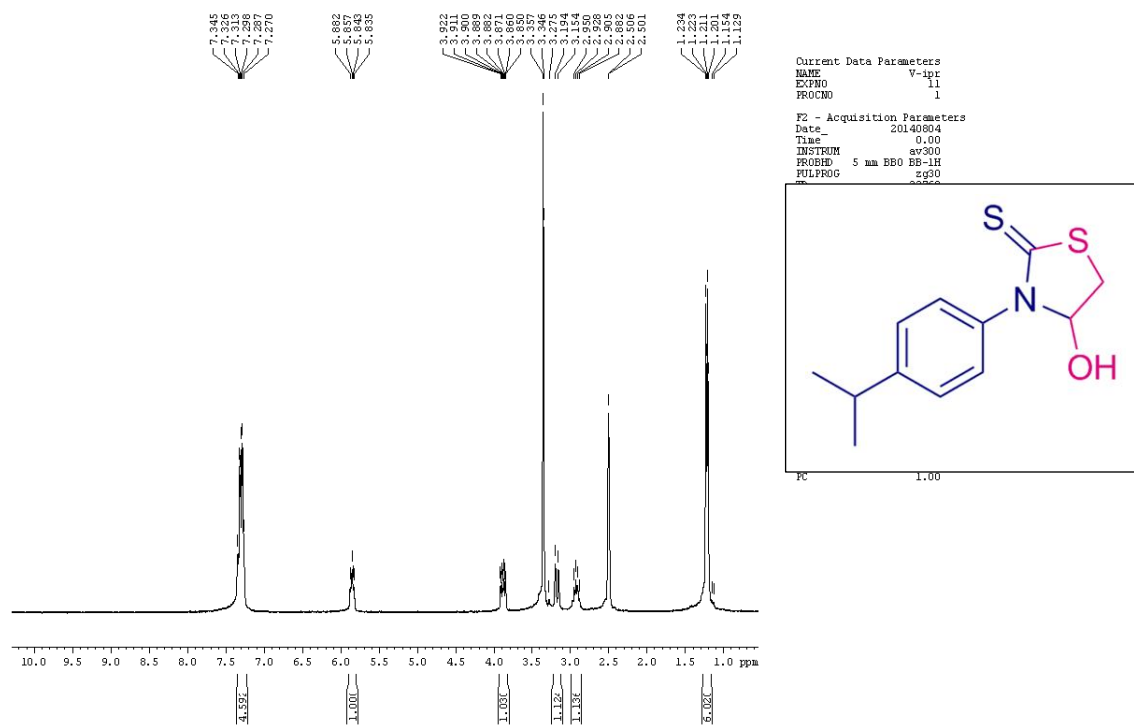

Fig.22 <sup>1</sup>H NMR Spectrum 3g (DMSO-d<sub>6</sub>)



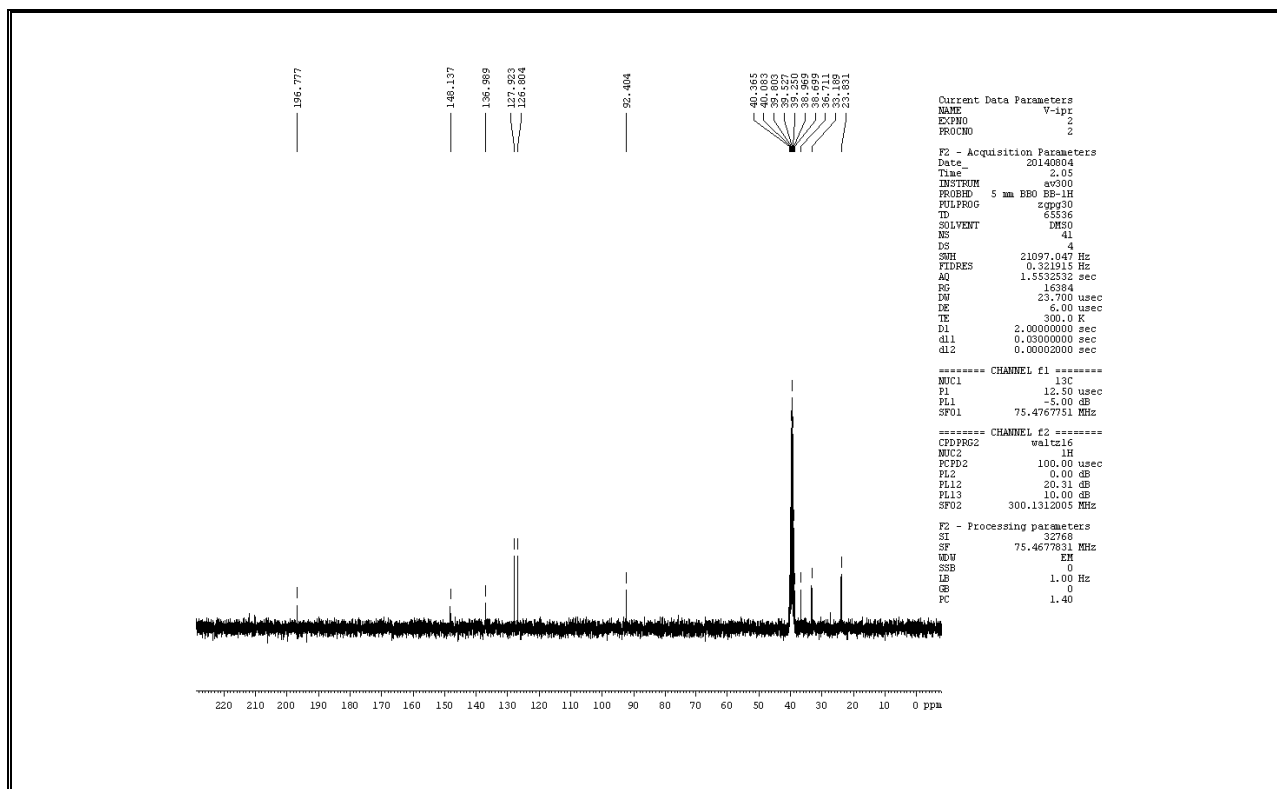

**Fig.23**  $^{13}\text{C}$  NMR Spectrum of **3g** (DMSO- $d_6$ )

V-6\_140812233707 #39 RT: 0.48 AV: 1 NL: 1.39E2  
T: ITMS + c ESI Full ms [150.00-1000.00]

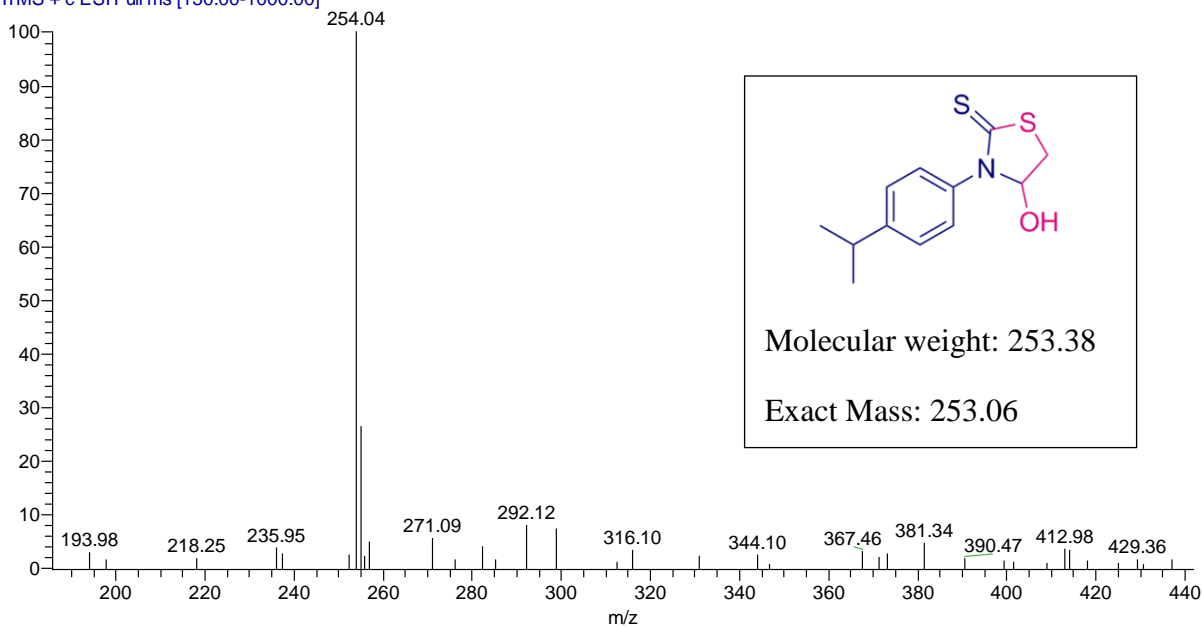

**Fig.24** ESI mass spectrum of **3g**

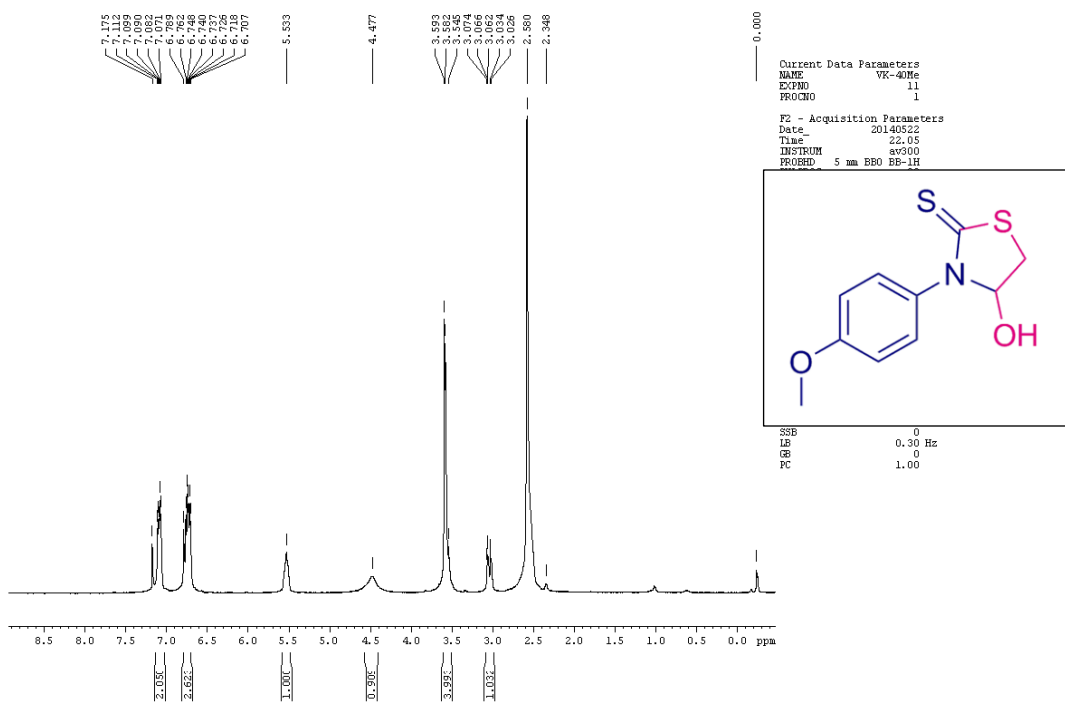

Fig.25  $^1\text{H}$  NMR Spectrum **3h** ( $\text{CDCl}_3 + \text{DMSO-d}_6$ )

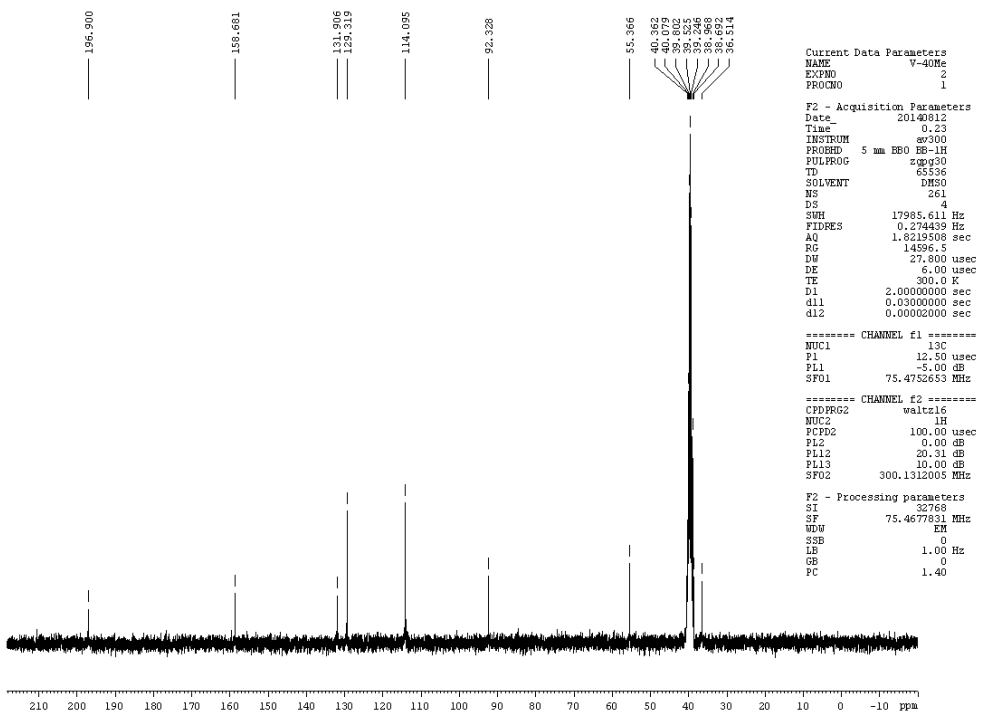

Fig.26  $^{13}\text{C}$  NMR Spectrum of **3h** ( $\text{DMSO-d}_6$ )

V-7\_140812233707 #32 RT: 0.39 AV: 1 NL: 3.87E1  
T: ITMS + c ESI Full ms [150.00-1000.00]

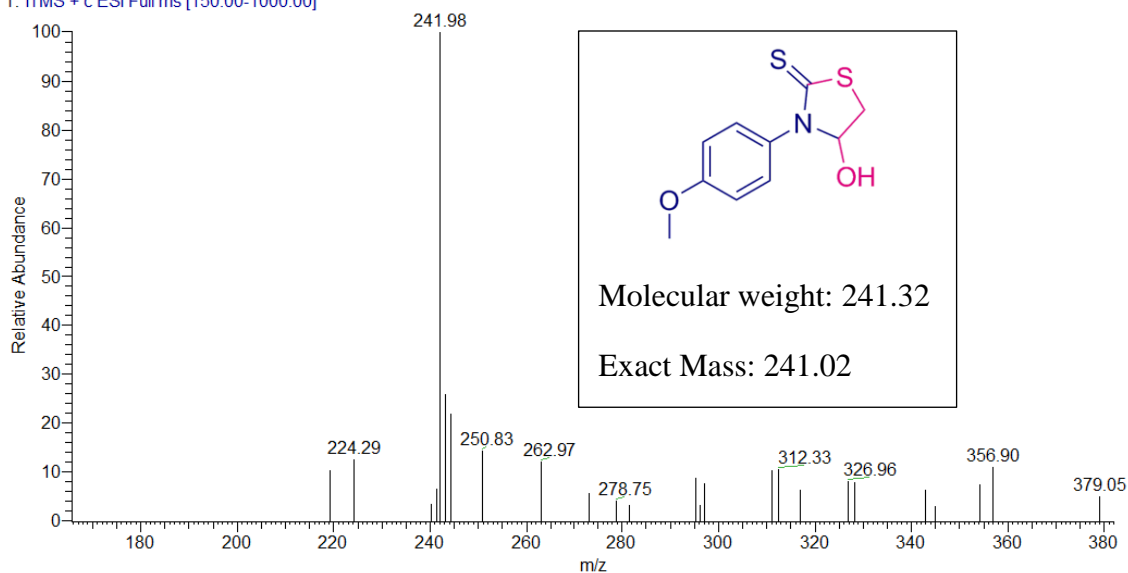

Fig.27 ESI mass spectrum of 3h

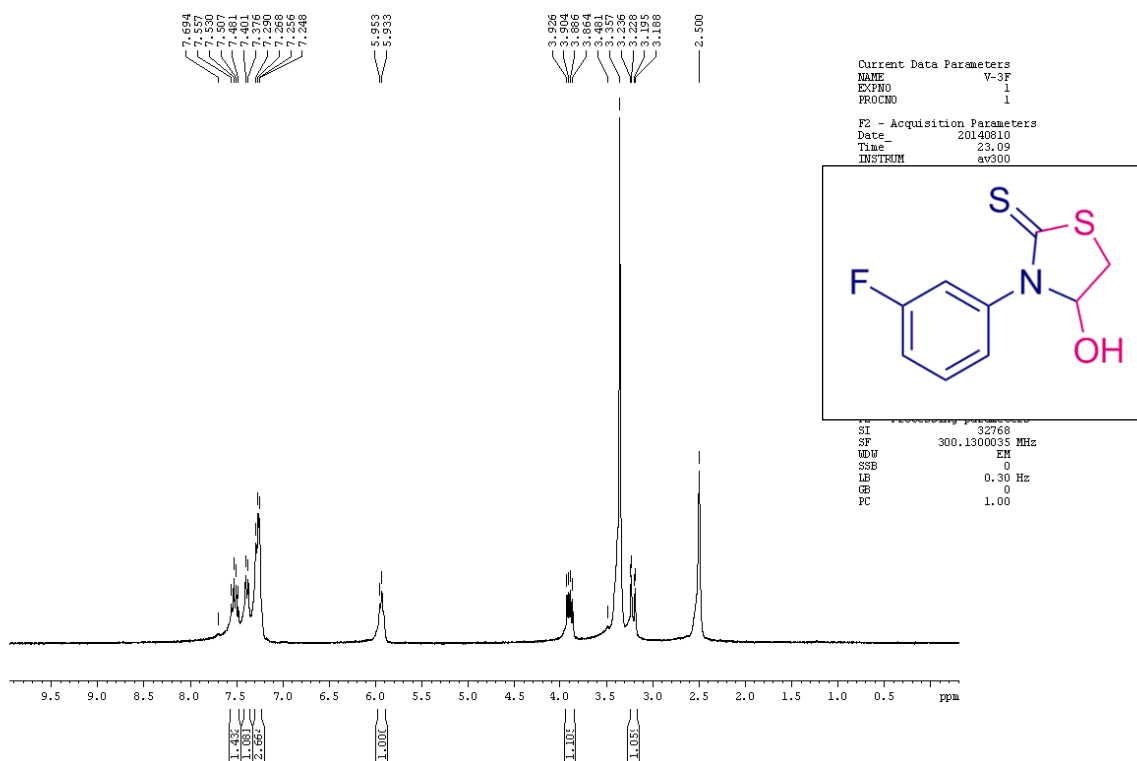

Fig.28 <sup>1</sup>H NMR Spectrum 3i (DMSO-d<sub>6</sub>)

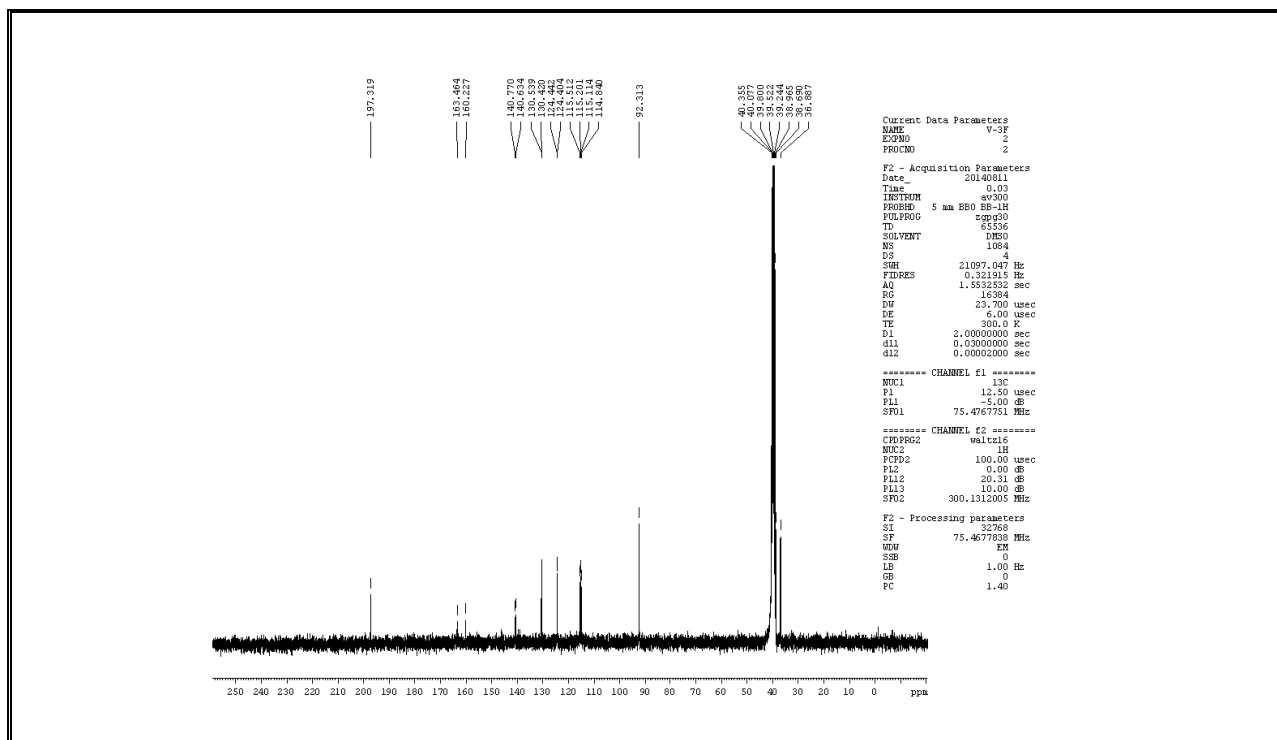

**Fig.29**  $^{13}\text{C}$  NMR Spectrum of **3i** (DMSO- $d_6$ )

V-11\_140812233707 #26 RT: 0.42 AV: 1 NL: 5.62E1  
T: ITMS + c ESI Full ms [150.00-2000.00]

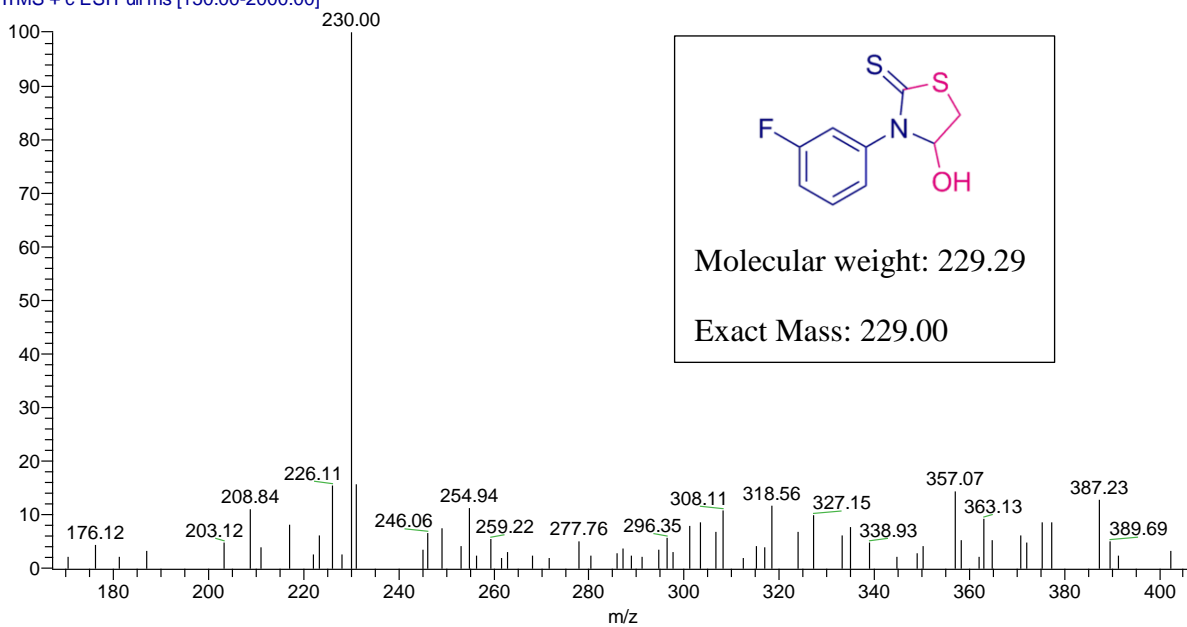

**Fig.30** ESI mass spectrum of **3i**

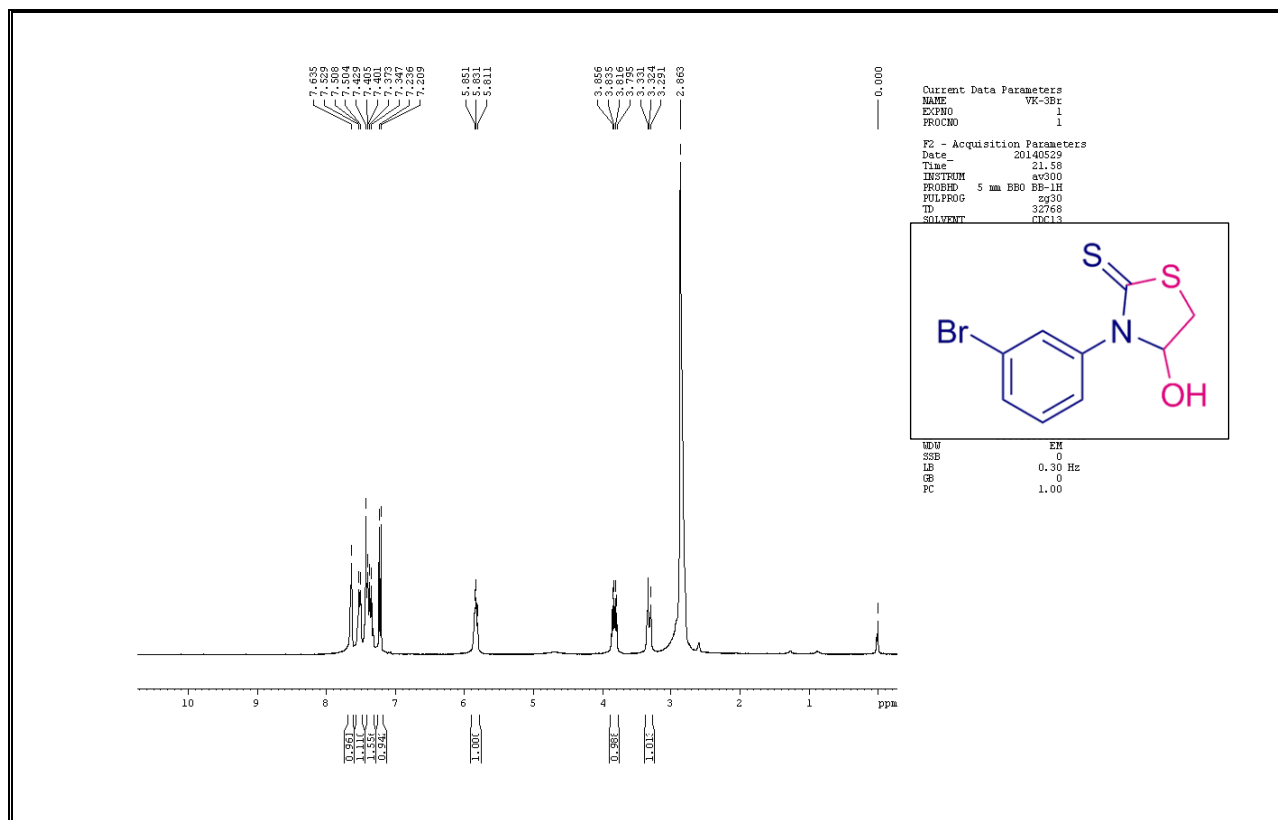

Fig.31 <sup>1</sup>H NMR Spectrum 3j (CDCl<sub>3</sub> + DMSO-d<sub>6</sub>)

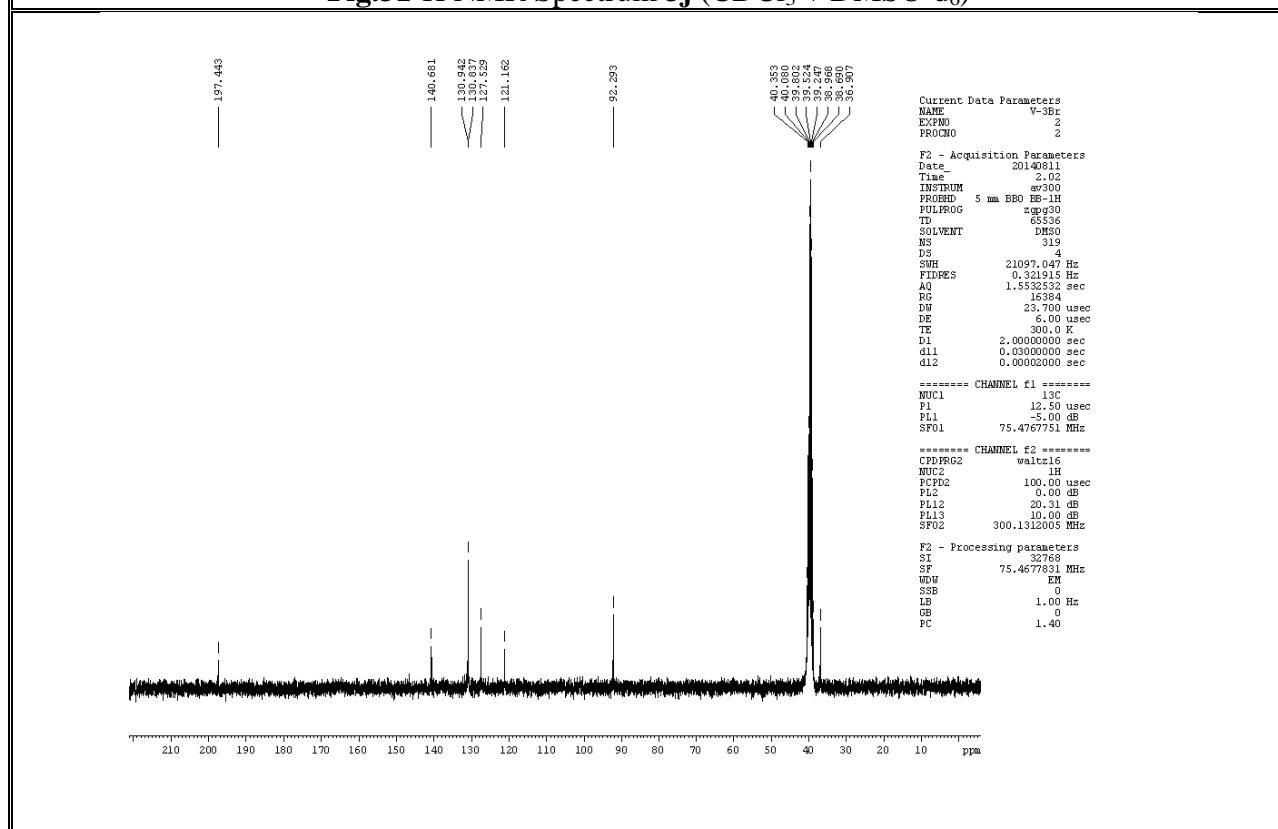

Fig.32 <sup>13</sup>C NMR Spectrum of 3j (DMSO-d<sub>6</sub>)

V-13\_140812233707 #53 RT: 0.65 AV: 1 NL: 1.42E2  
T: ITMS + c ESI Full ms [150.00-1000.00]

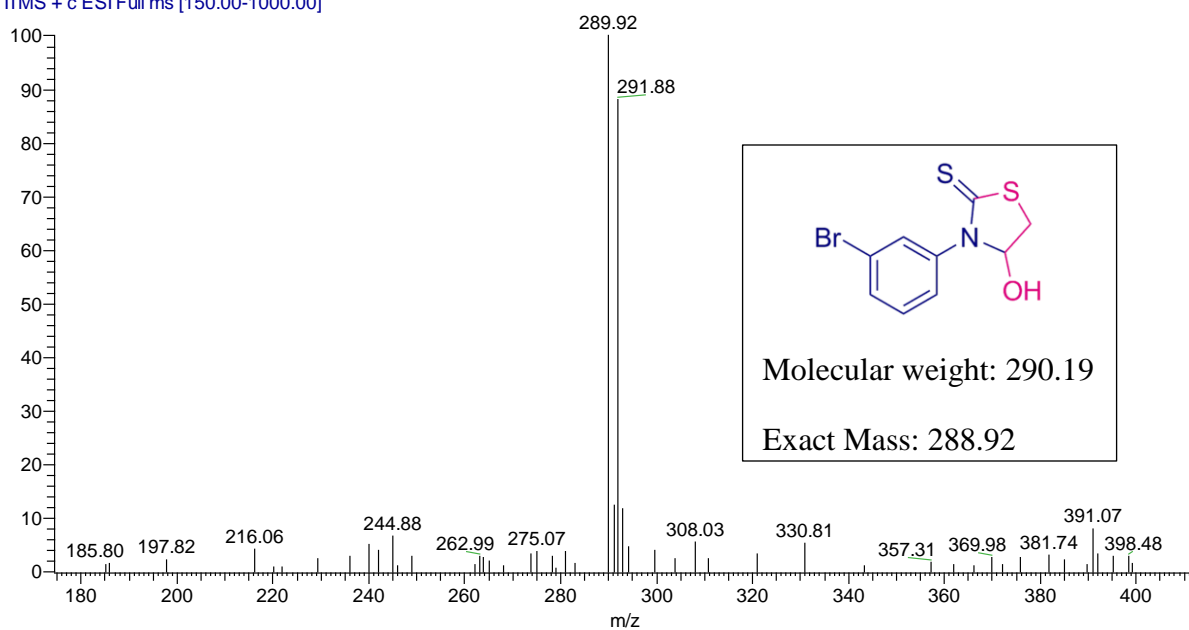

Fig.33 ESI mass spectrum of **3j**

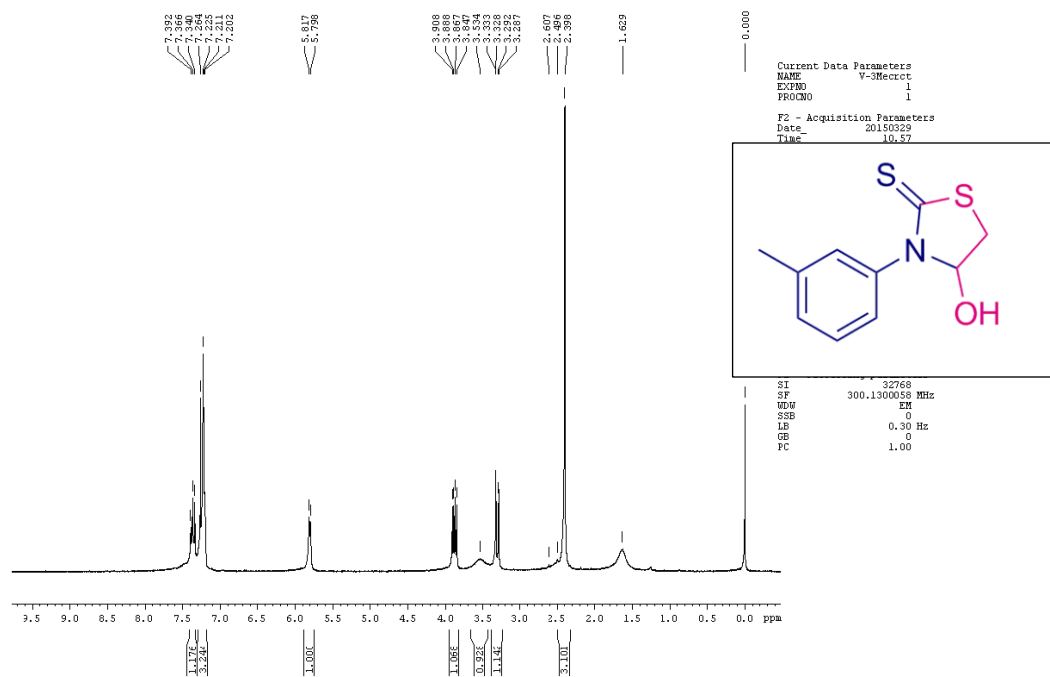

Fig.34  $^1\text{H}$  NMR Spectrum **3k** ( $\text{CDCl}_3$ )

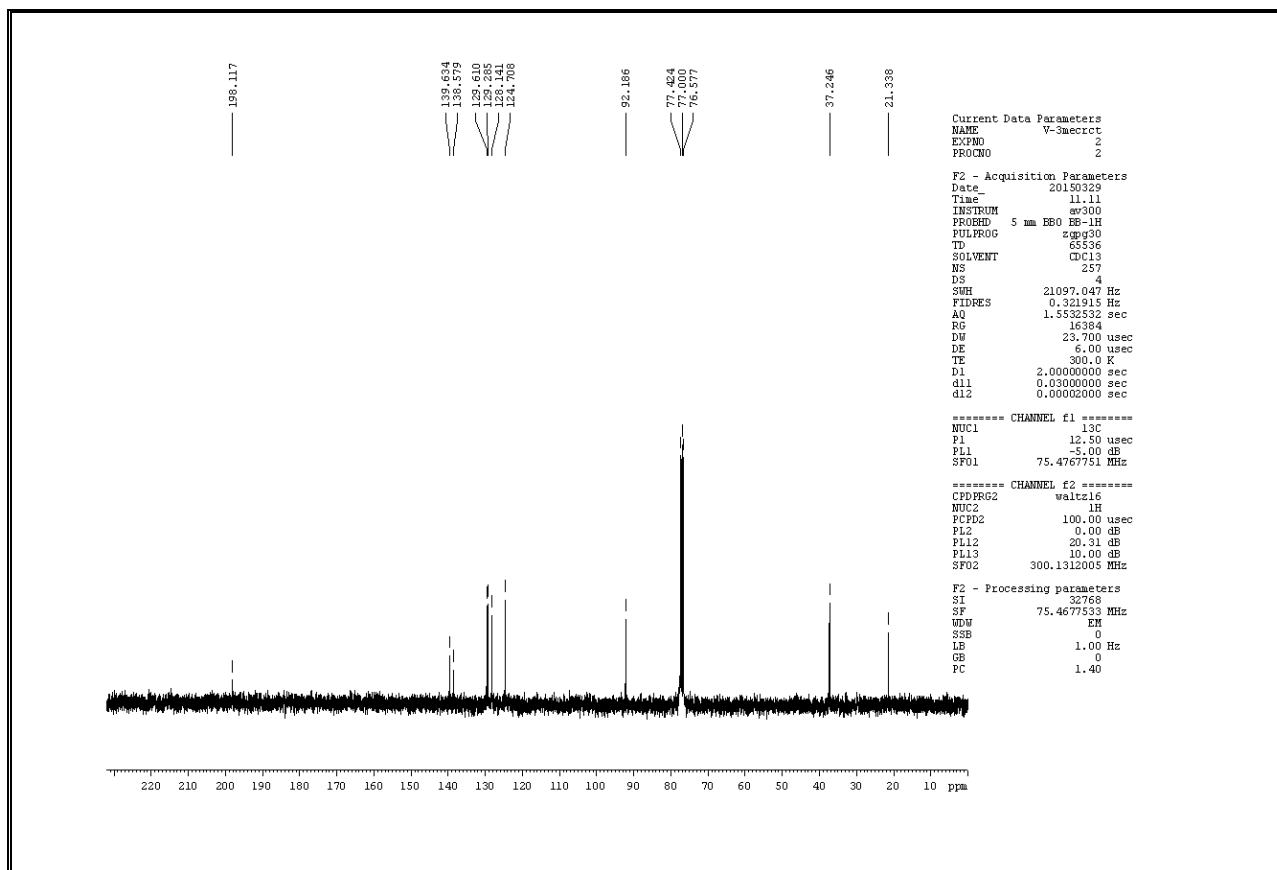

**Fig.35**  $^{13}\text{C}$  NMR Spectrum of **3k** ( $\text{CDCl}_3$ )

3ME #15 RT: 0.19 AV: 1 NL: 3.26E3  
T: ITMS + c ESI Full ms [50.00-1000.00]

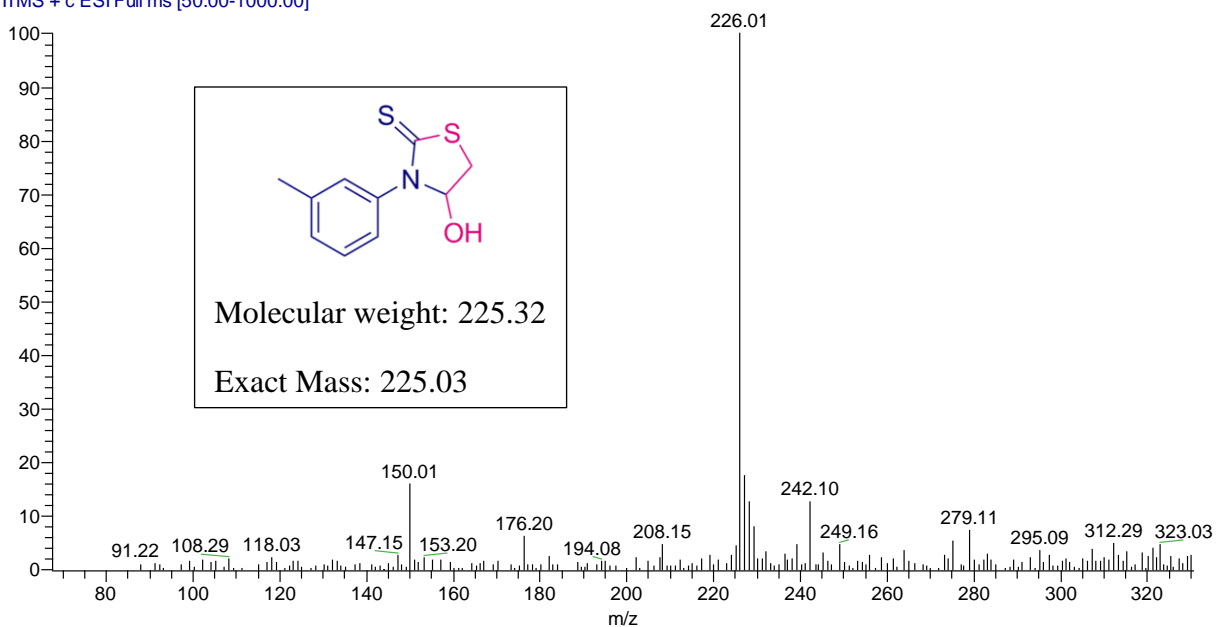

**Fig.36** ESI mass spectrum of **3k**

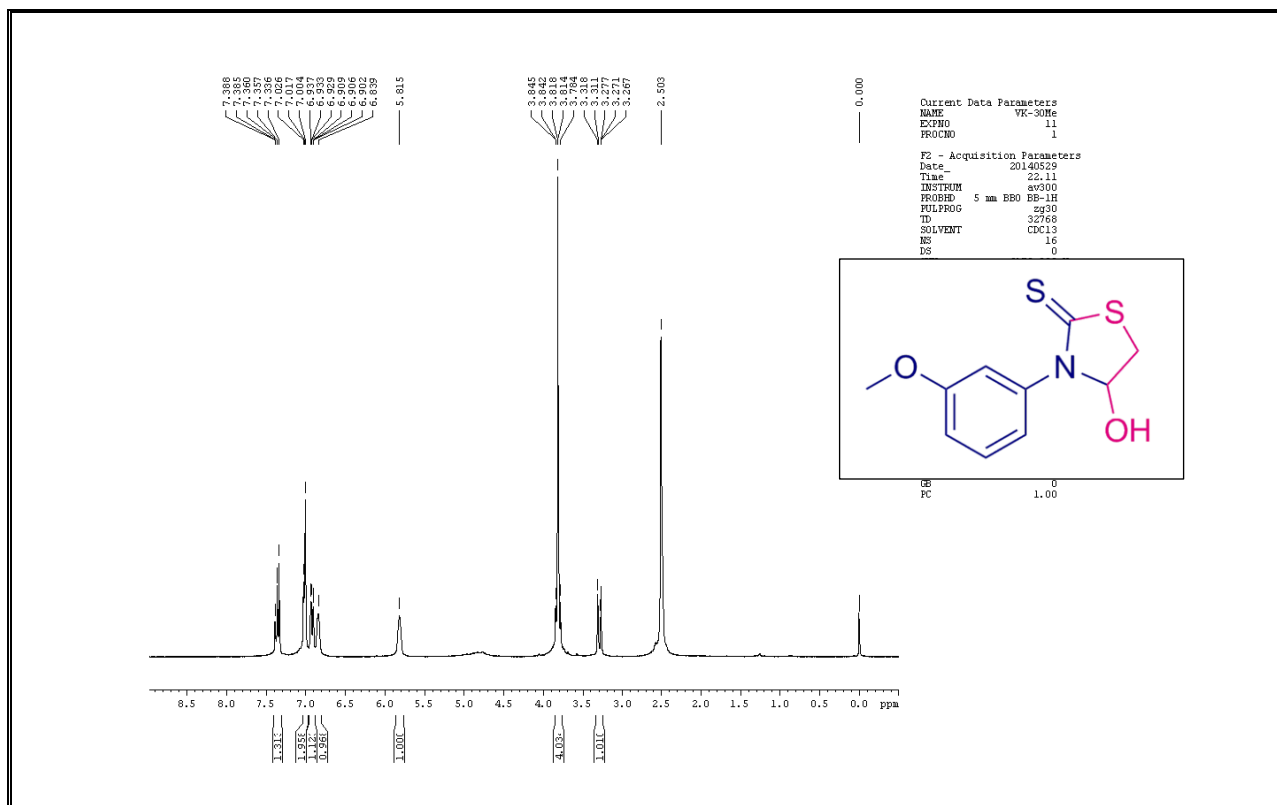

Fig.37 <sup>1</sup>H NMR Spectrum 3l (CDCl<sub>3</sub> + DMSO-d<sub>6</sub>)

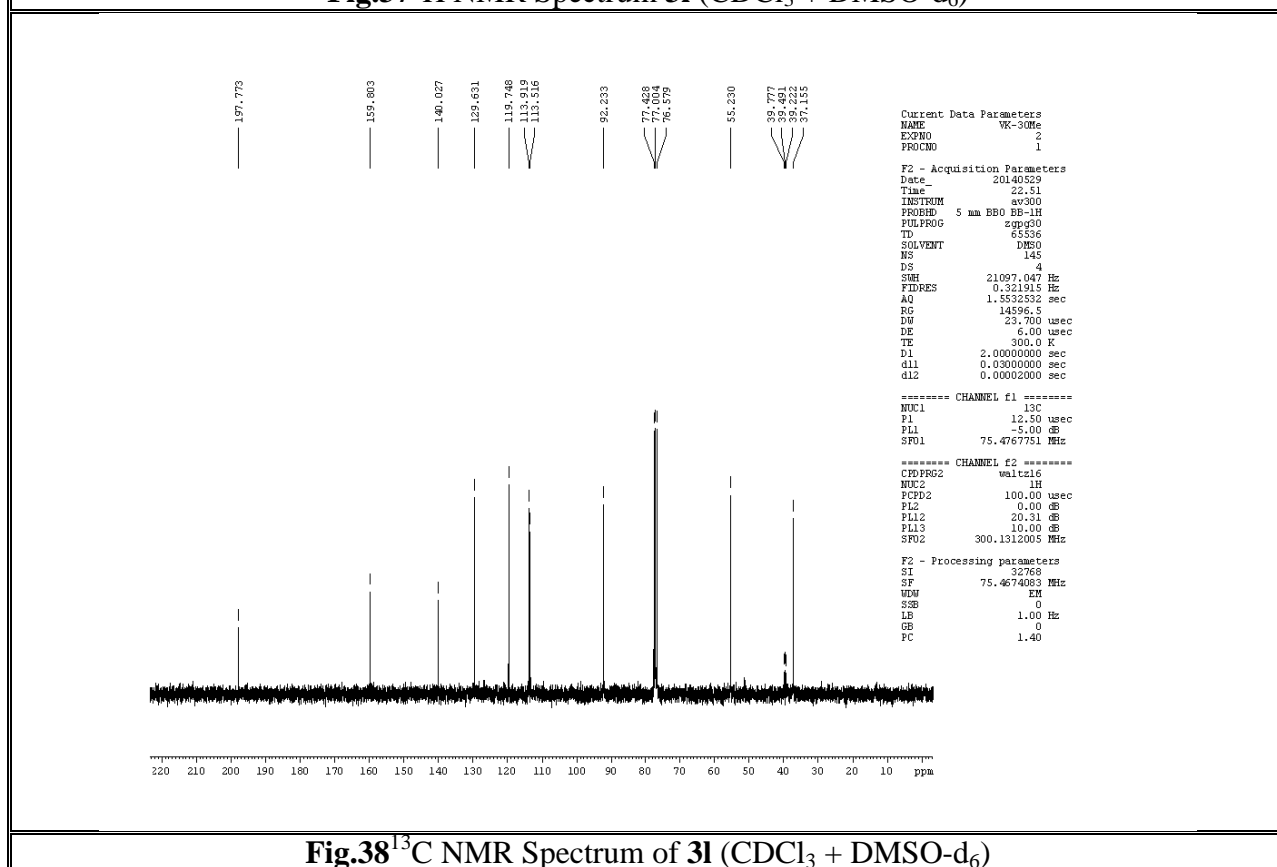

Fig.38 <sup>13</sup>C NMR Spectrum of 3l (CDCl<sub>3</sub> + DMSO-d<sub>6</sub>)



V-14\_140812233707 #29 RT: 0.35 AV: 1 NL: 1.68E2  
T: ITMS + c ESI Full ms [150.00-1000.00]

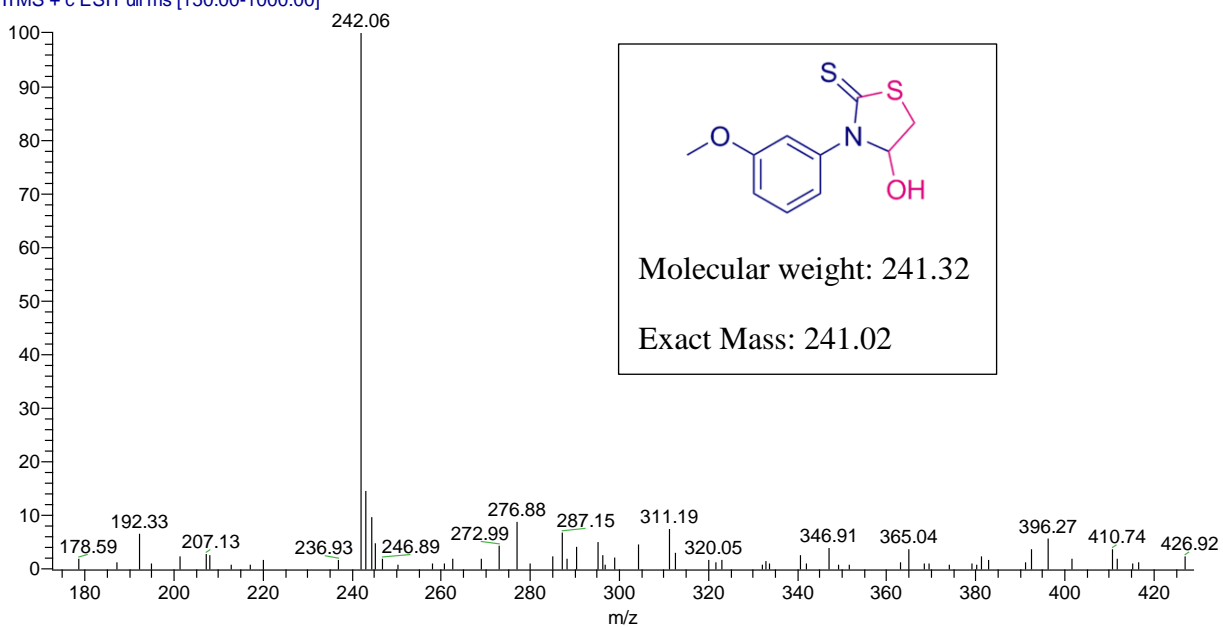

Fig.39 ESI mass spectrum of 31

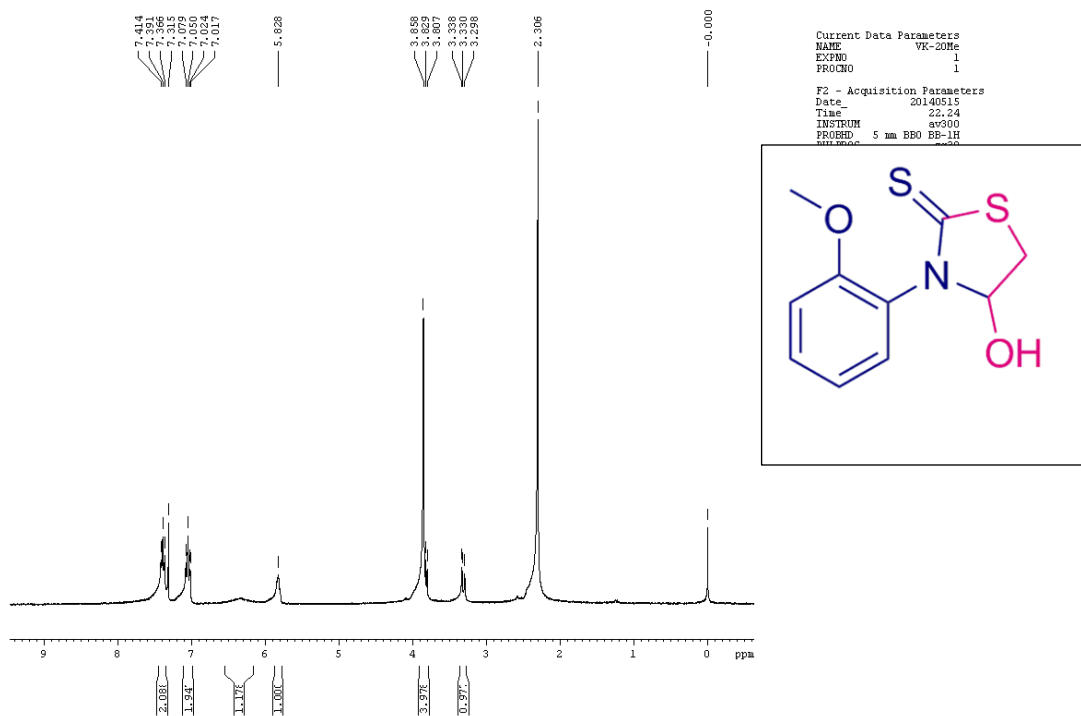

Fig.40  $^1\text{H}$  NMR Spectrum 3m ( $\text{CDCl}_3 + \text{DMSO-d}_6$ )

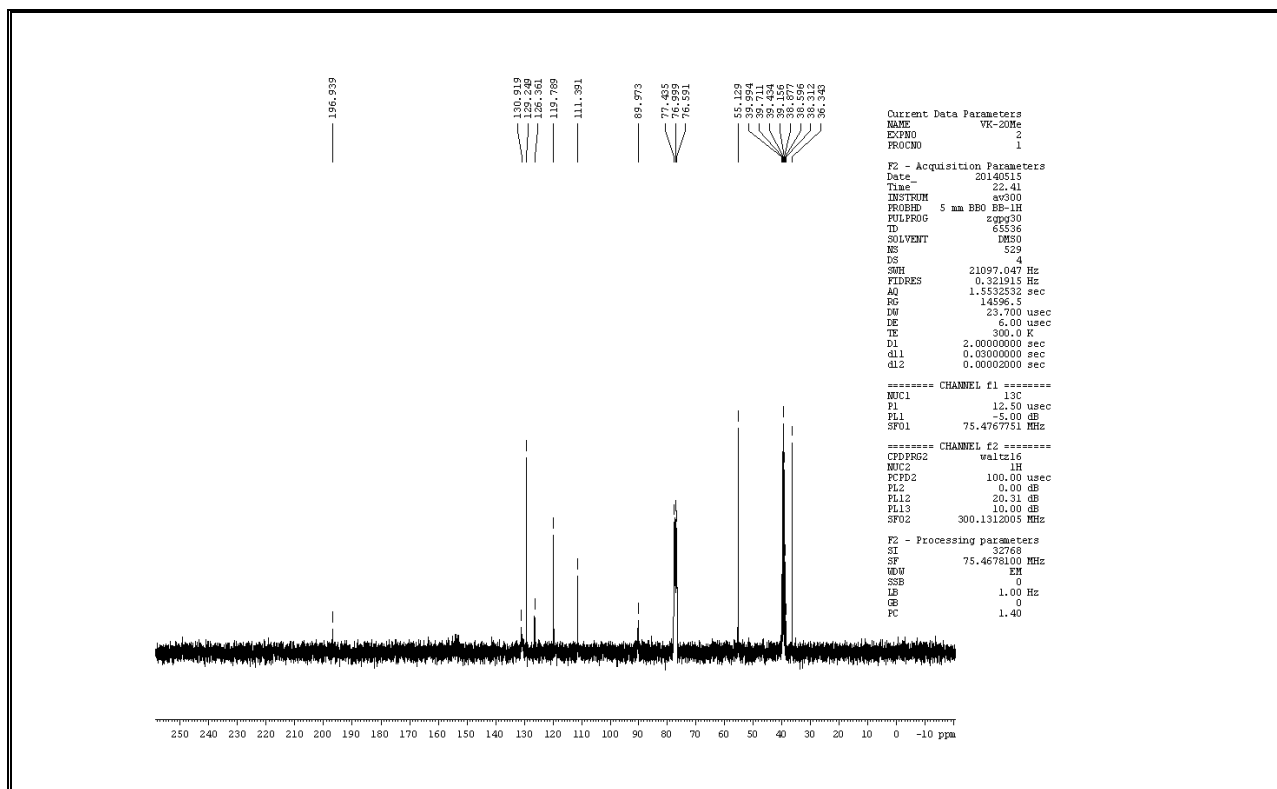

Fig.41 <sup>13</sup>C NMR Spectrum of 3m(CDCl<sub>3</sub> + DMSO-d<sub>6</sub>)

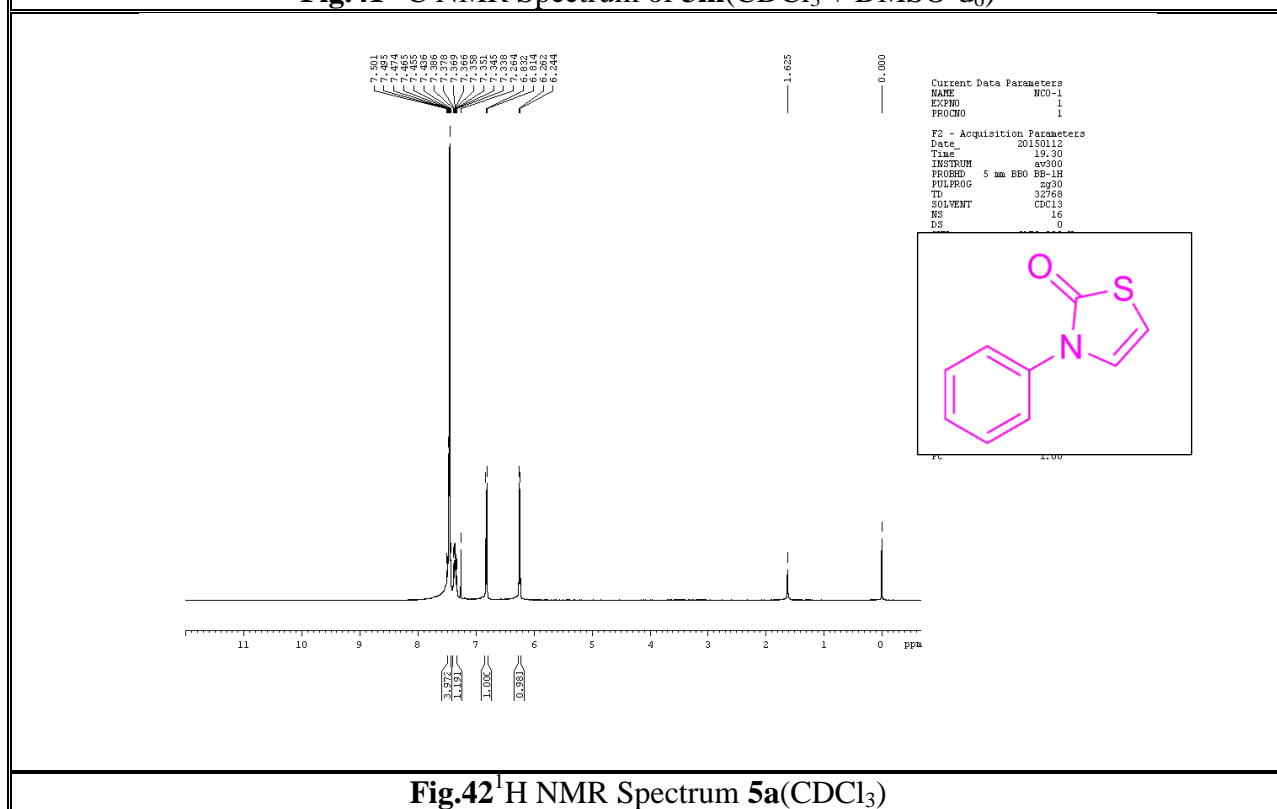

Fig.42 <sup>1</sup>H NMR Spectrum 5a(CDCl<sub>3</sub>)

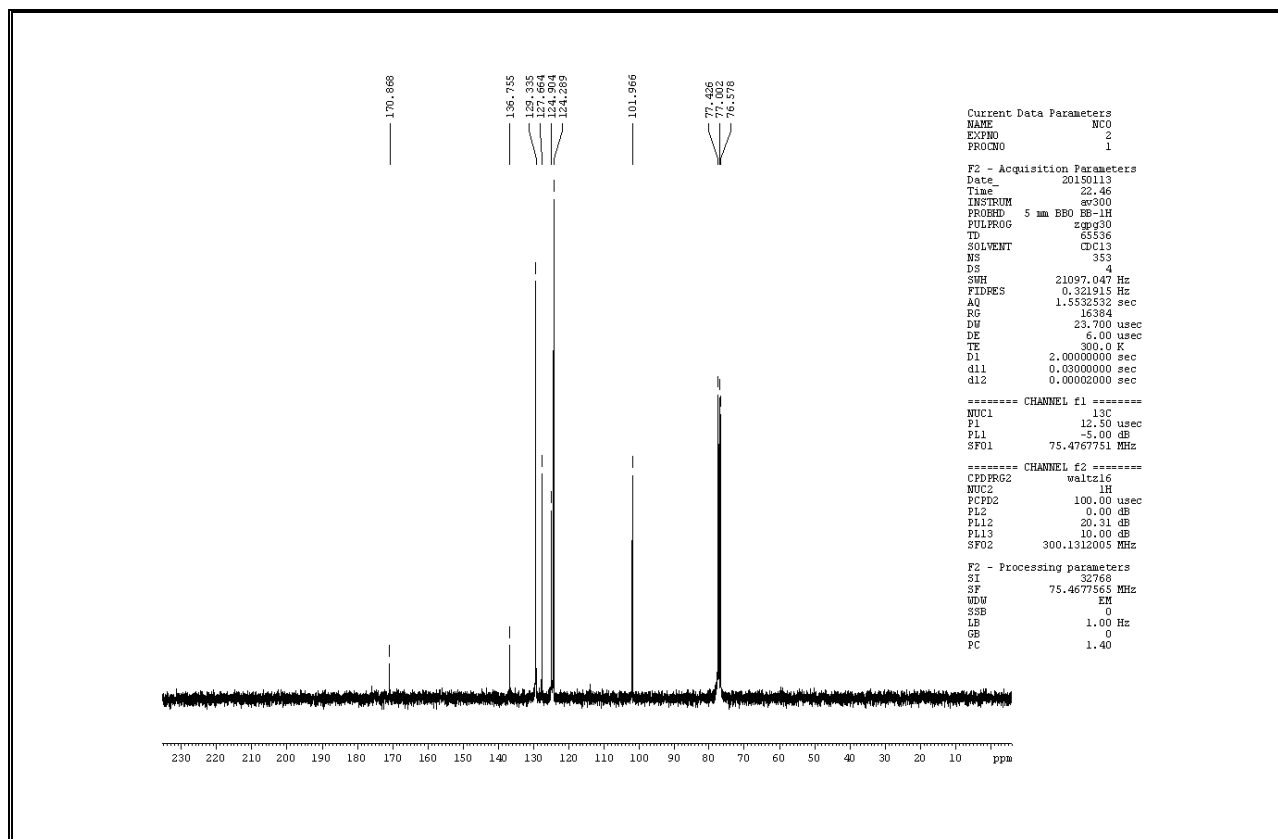

Fig.43  $^{13}\text{C}$  NMR Spectrum of **5a**( $\text{CDCl}_3$ )

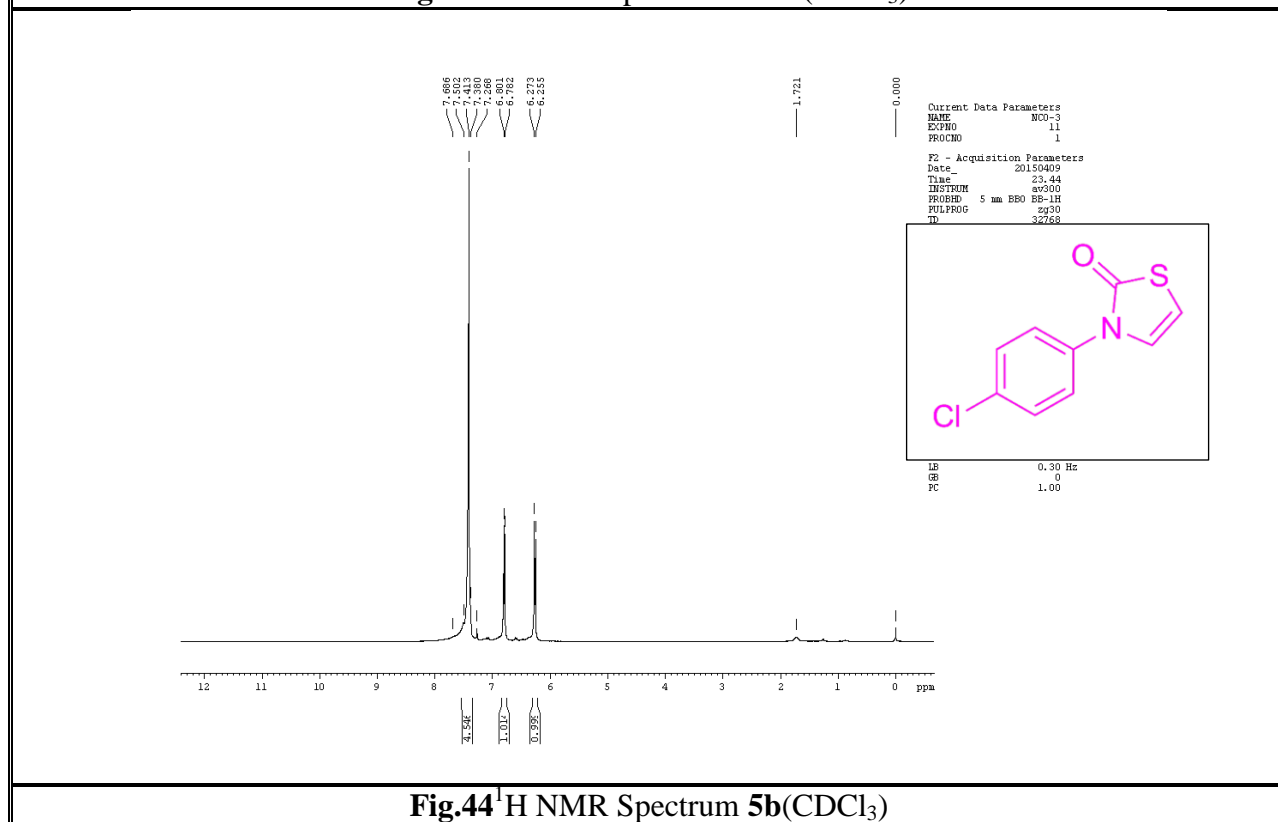

Fig.44  $^1\text{H}$  NMR Spectrum **5b**( $\text{CDCl}_3$ )

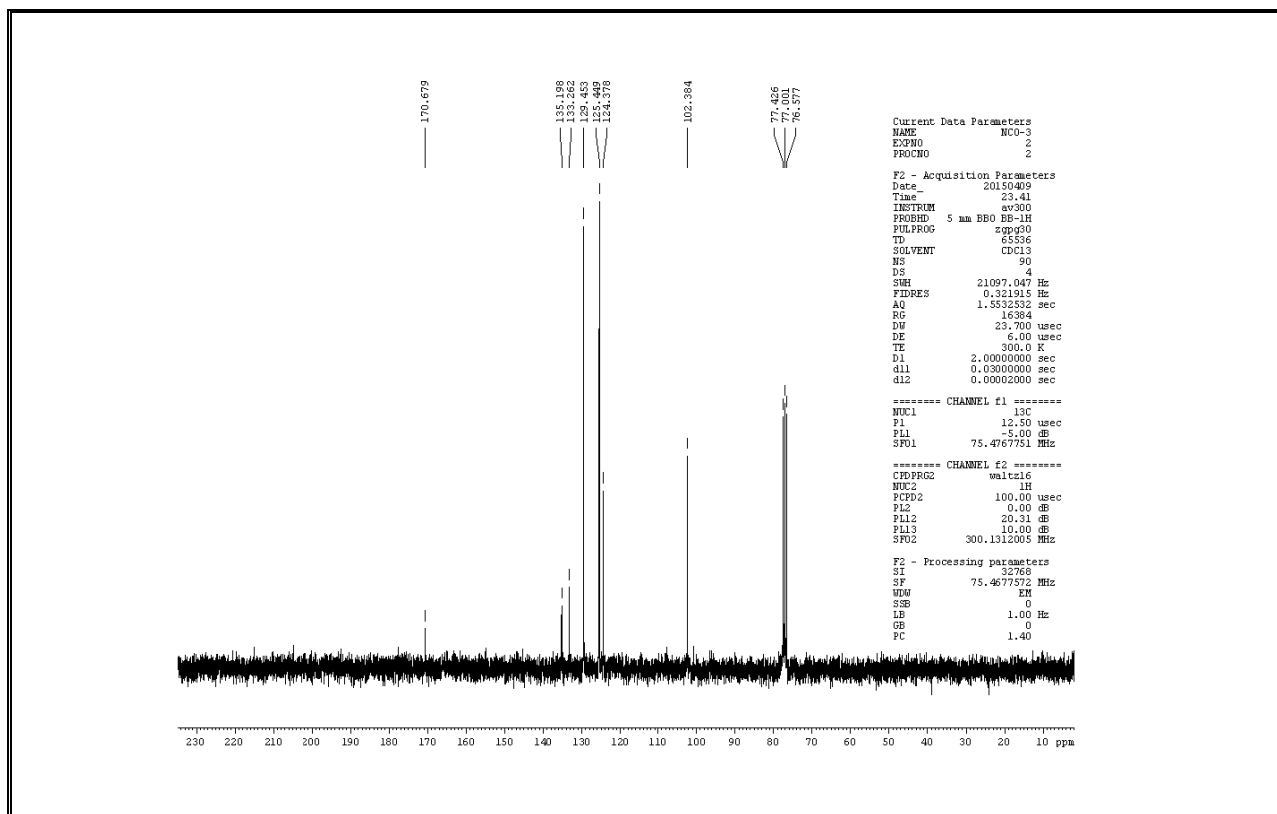

Fig.45  $^{13}\text{C}$  NMR Spectrum of **5b**( $\text{CDCl}_3$ )

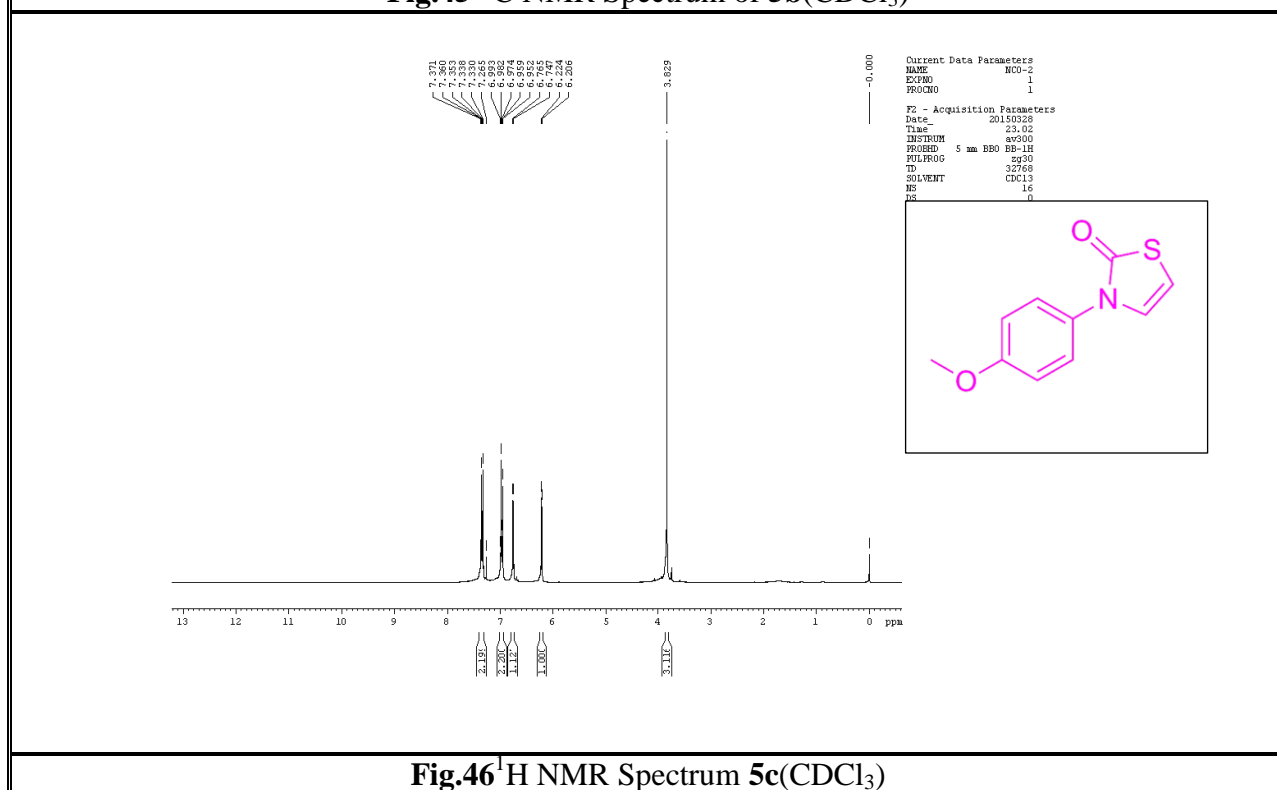

Fig.46  $^1\text{H}$  NMR Spectrum **5c**( $\text{CDCl}_3$ )

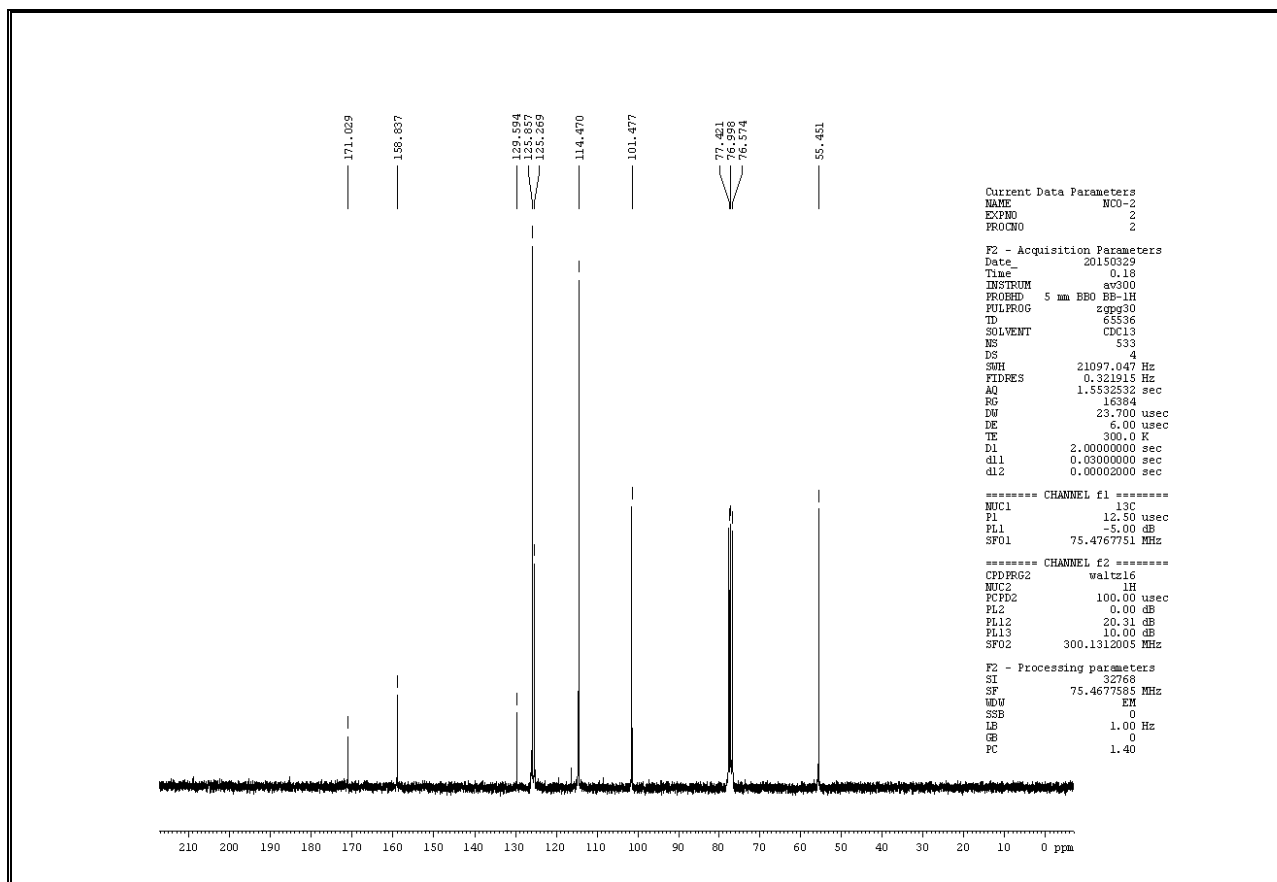

Fig.47 <sup>13</sup>C NMR Spectrum of 5c(CDCl<sub>3</sub>)

NCO-2 #19 RT: 0.24 AV: 1 NL: 5.99E3  
 T: ITMS + c ESI Full ms [50.00-1000.00]

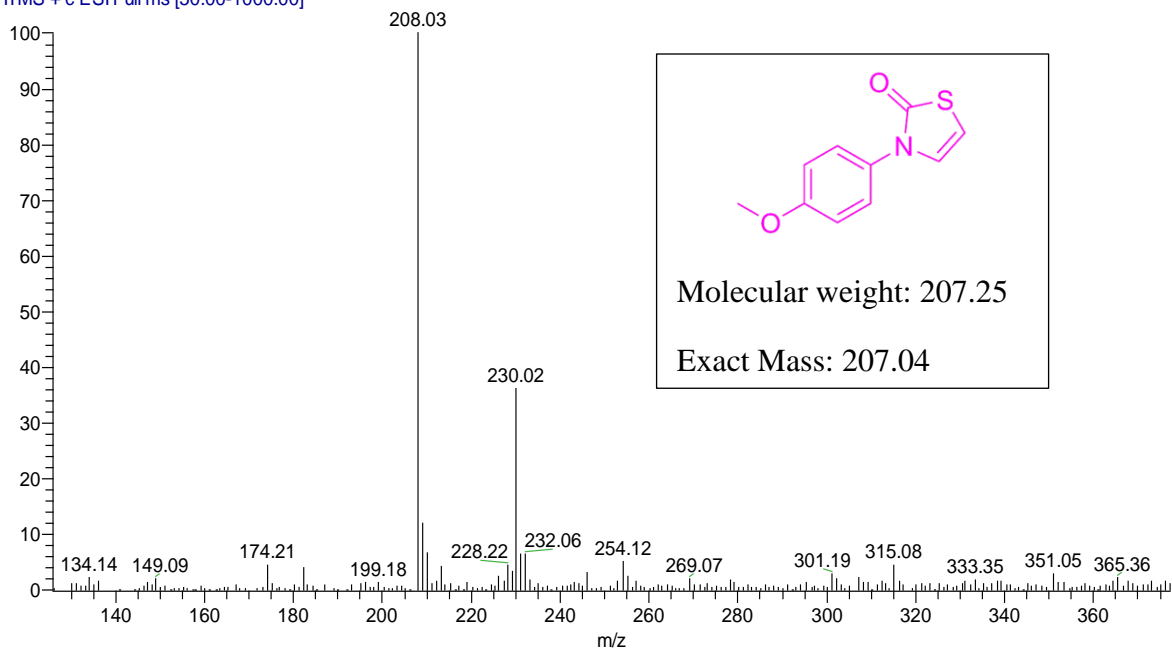

Fig.48 ESI mass spectrum of 5c

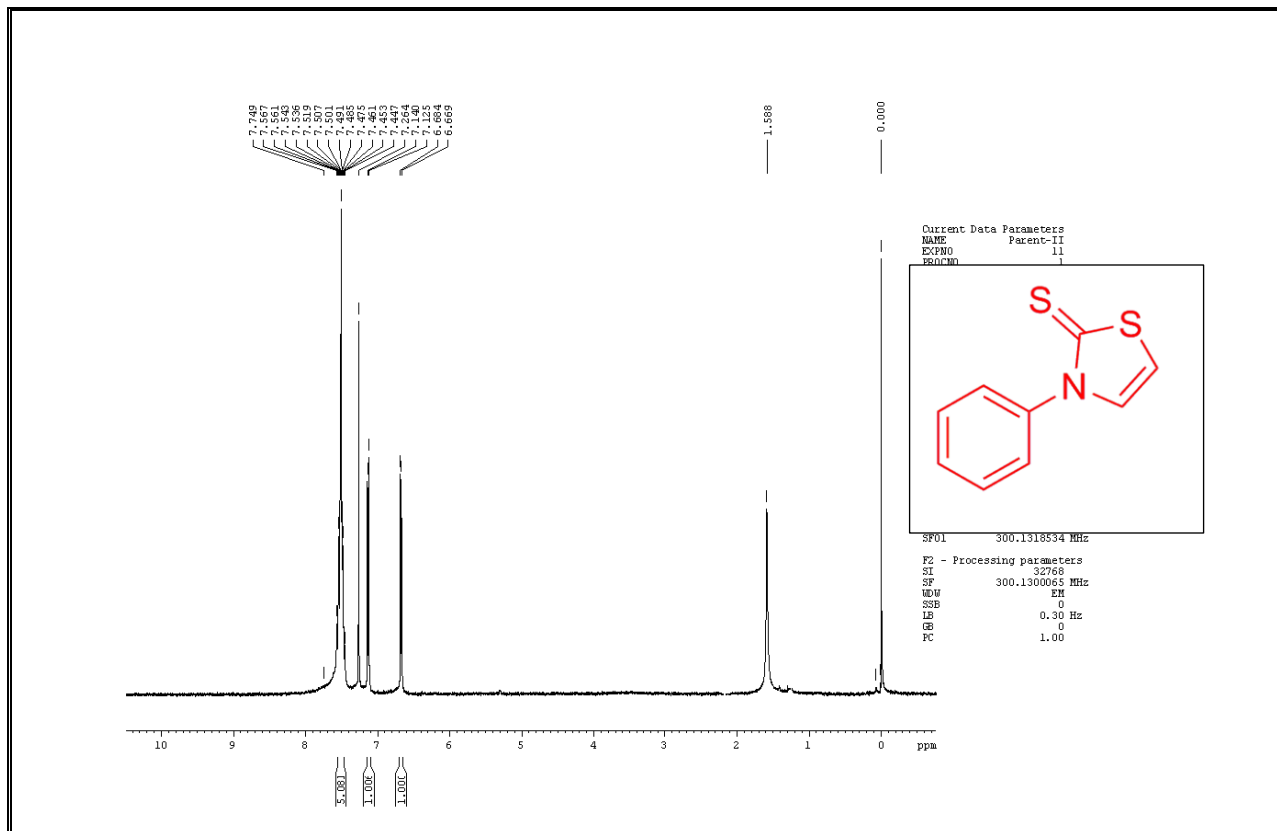

Fig.49 <sup>1</sup>H NMR Spectrum 6a(CDCl<sub>3</sub>)

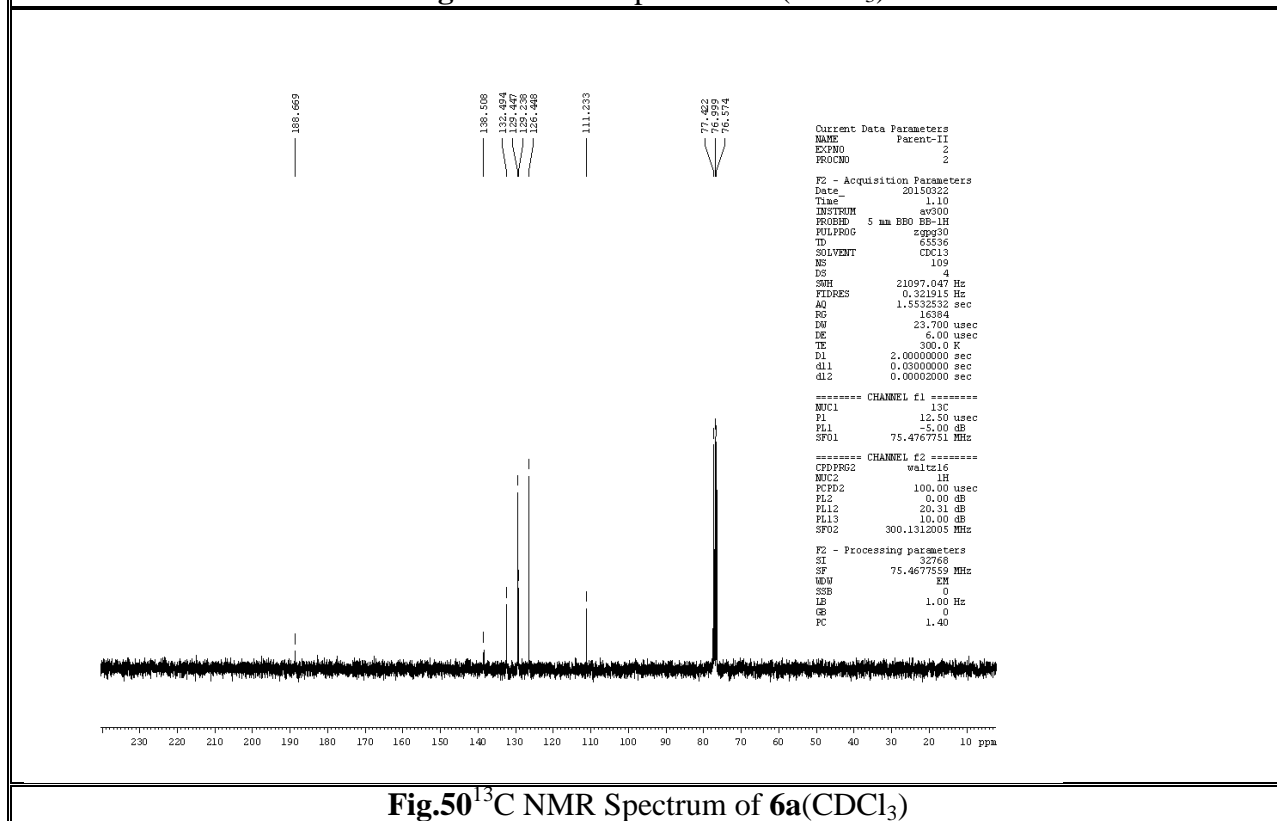

Fig.50 <sup>13</sup>C NMR Spectrum of 6a(CDCl<sub>3</sub>)

H-II #29 RT: 0.36 AV: 1 NL: 3.40E3  
T: ITMS + c ESI Full ms [50.00-1000.00]

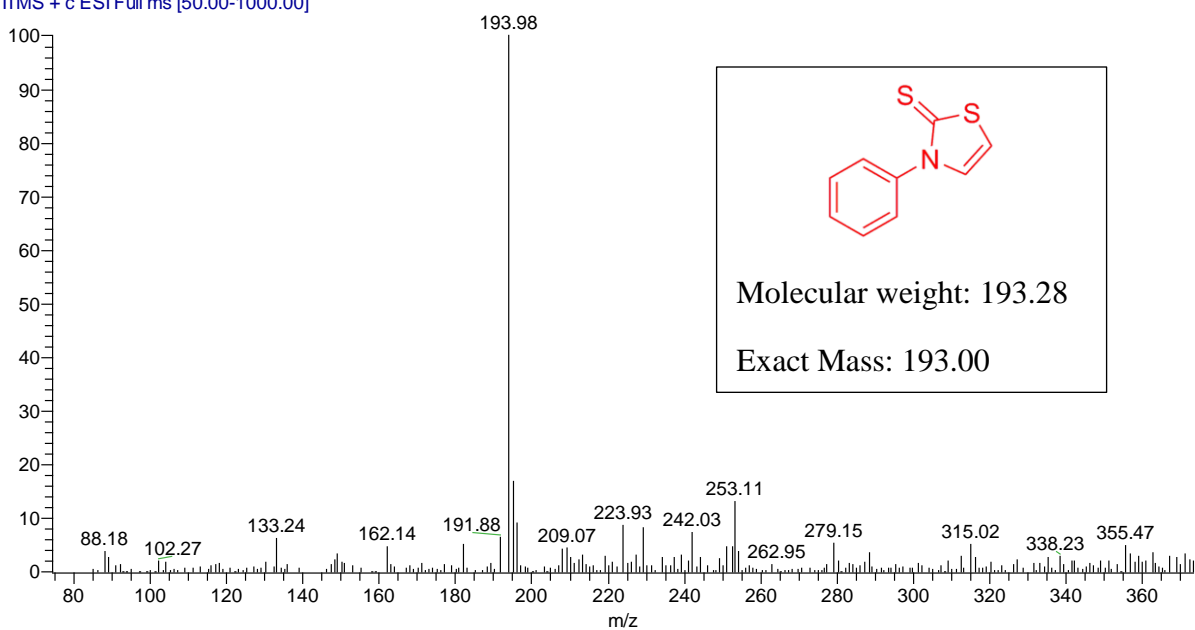

Fig.51 ESI mass spectrum of 6a

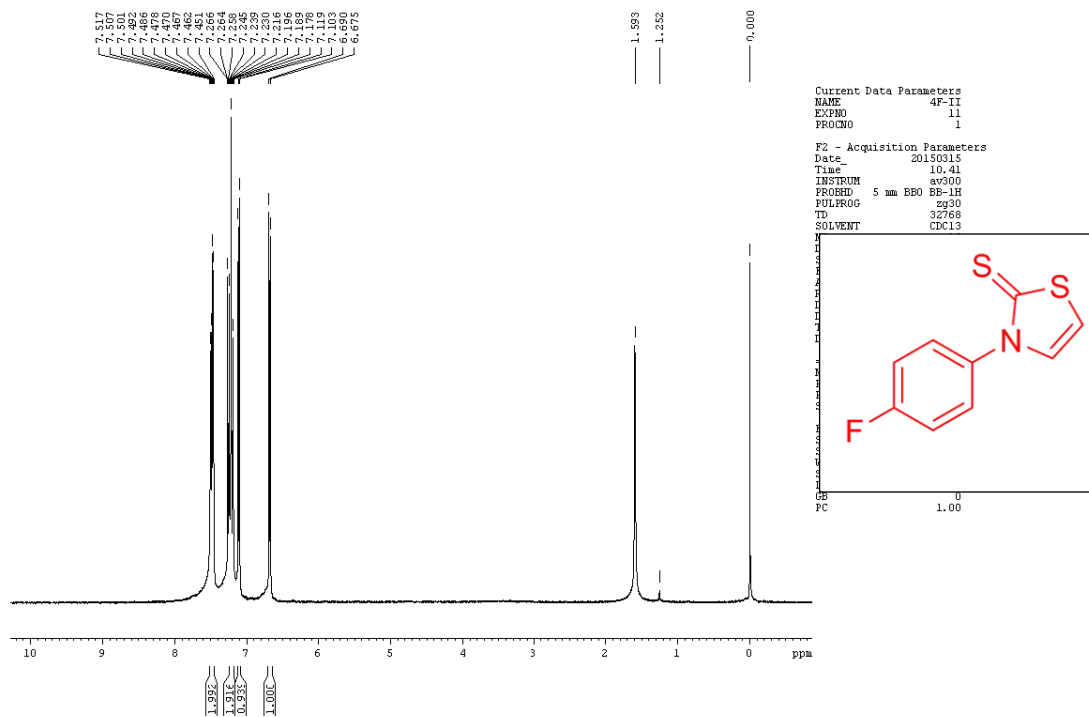

Fig.52 <sup>1</sup>H NMR Spectrum 6b(CDCl<sub>3</sub>)

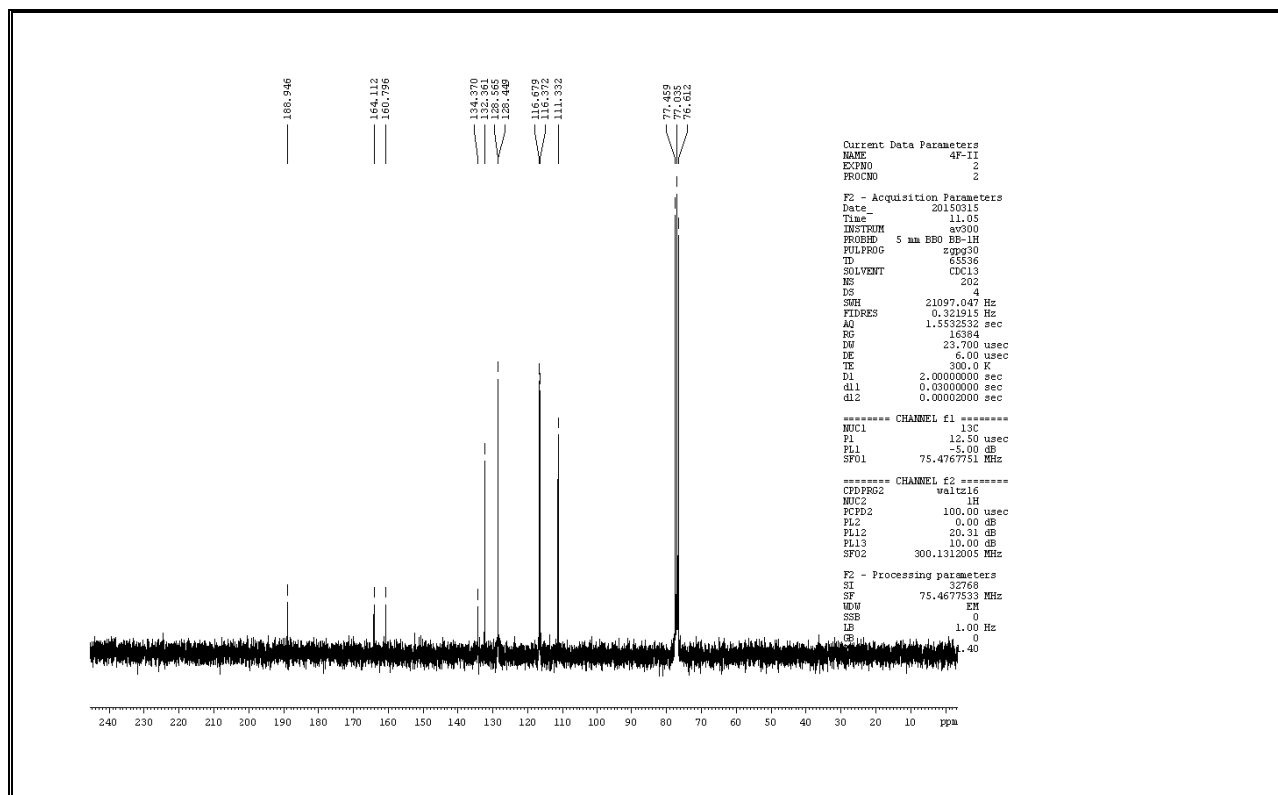

Fig.53 <sup>13</sup>C NMR Spectrum of **6b**(CDCl<sub>3</sub>)

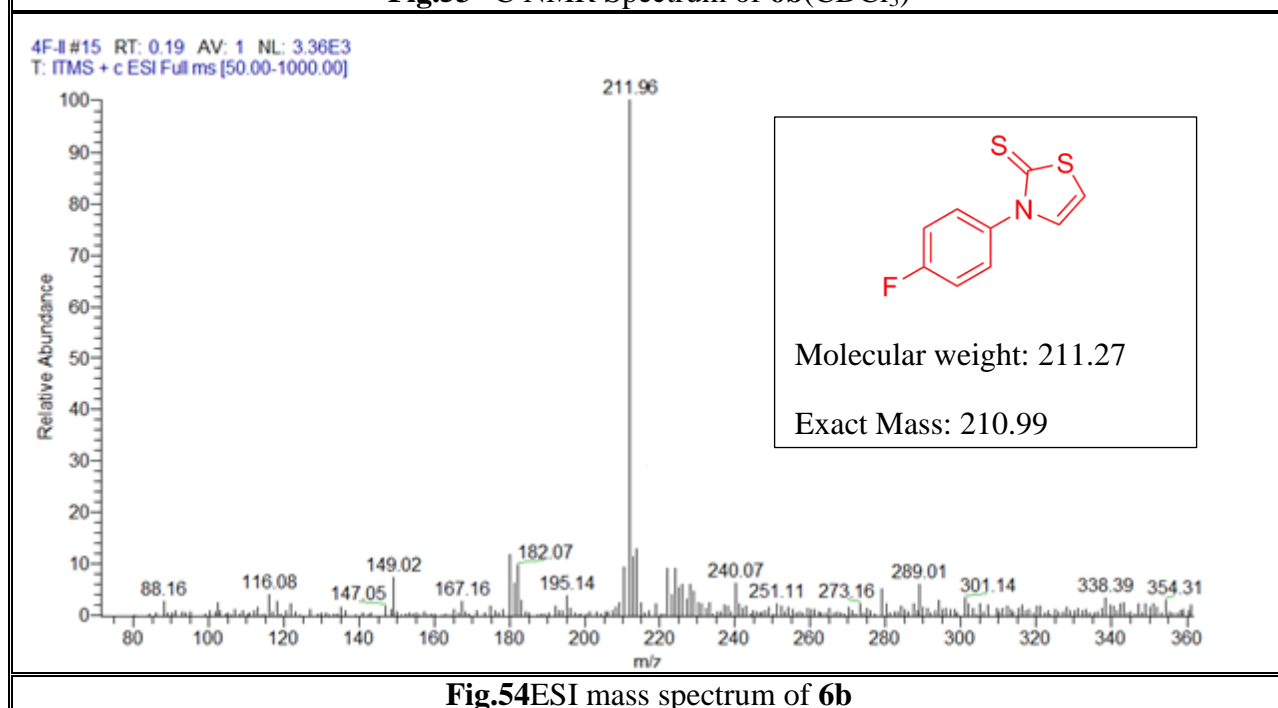

Fig.54 ESI mass spectrum of **6b**



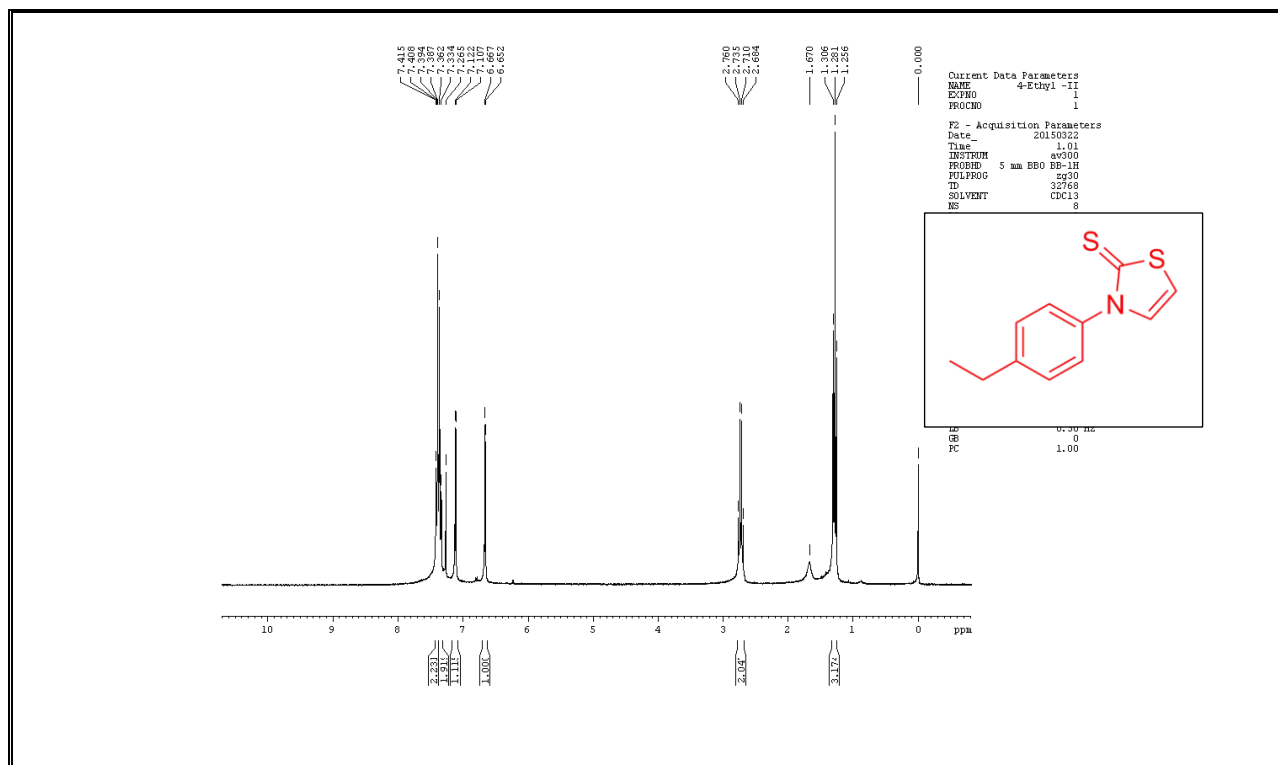

Fig.55  $^1\text{H}$  NMR Spectrum **6c**( $\text{CDCl}_3$ )

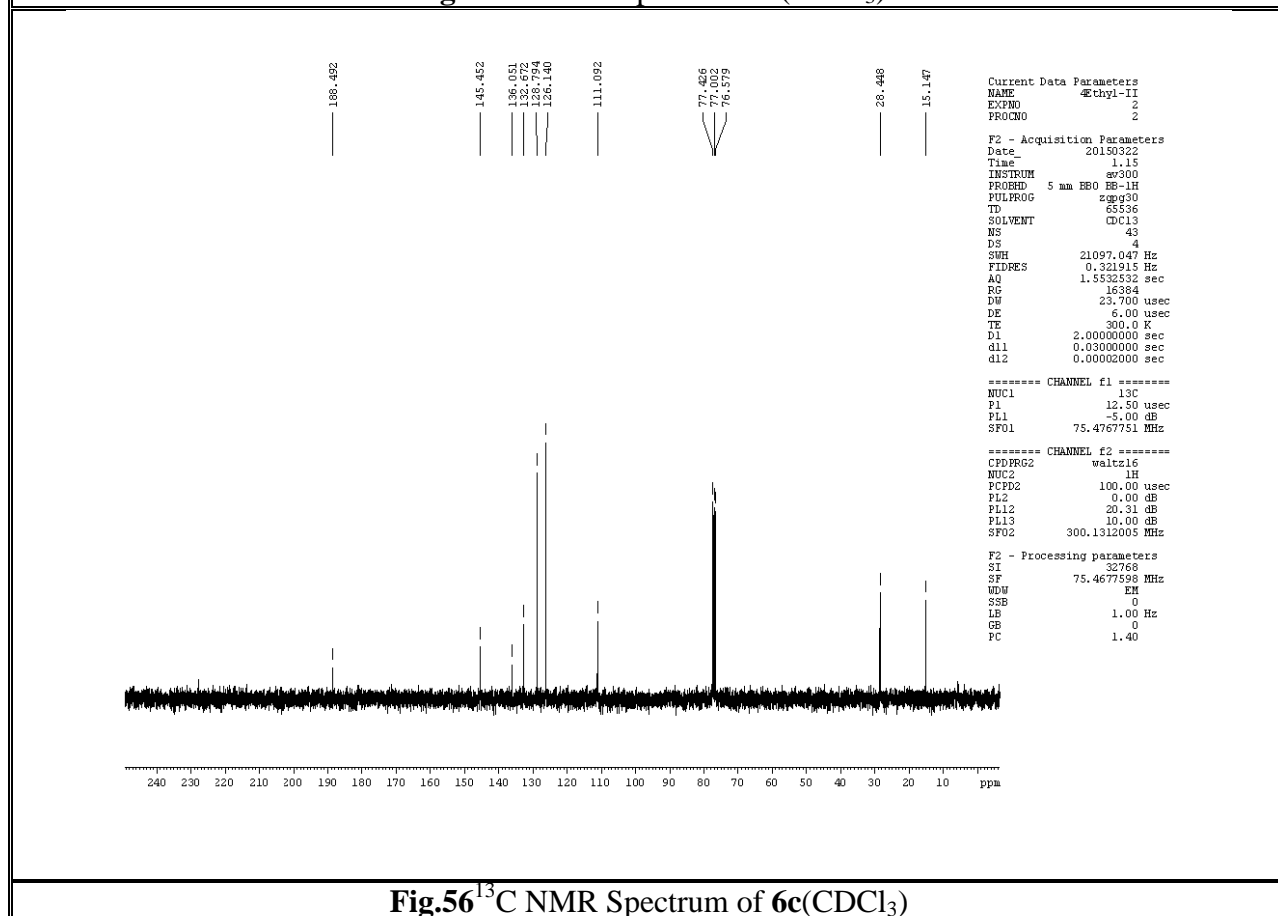

Fig.56  $^{13}\text{C}$  NMR Spectrum of **6c**( $\text{CDCl}_3$ )

4ET-II #33 RT: 0.41 AV: 1 NL: 5.58E3  
T: ITMS + c ESI Full ms [50.00-1000.00]

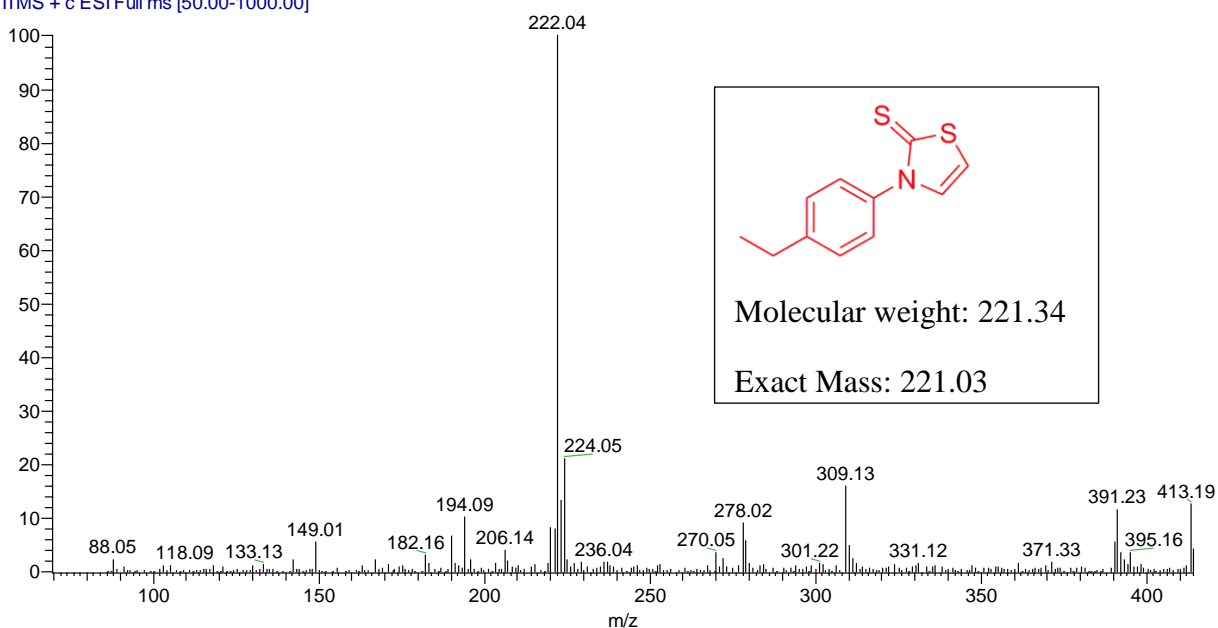

Fig.57 ESI mass spectrum of 6c

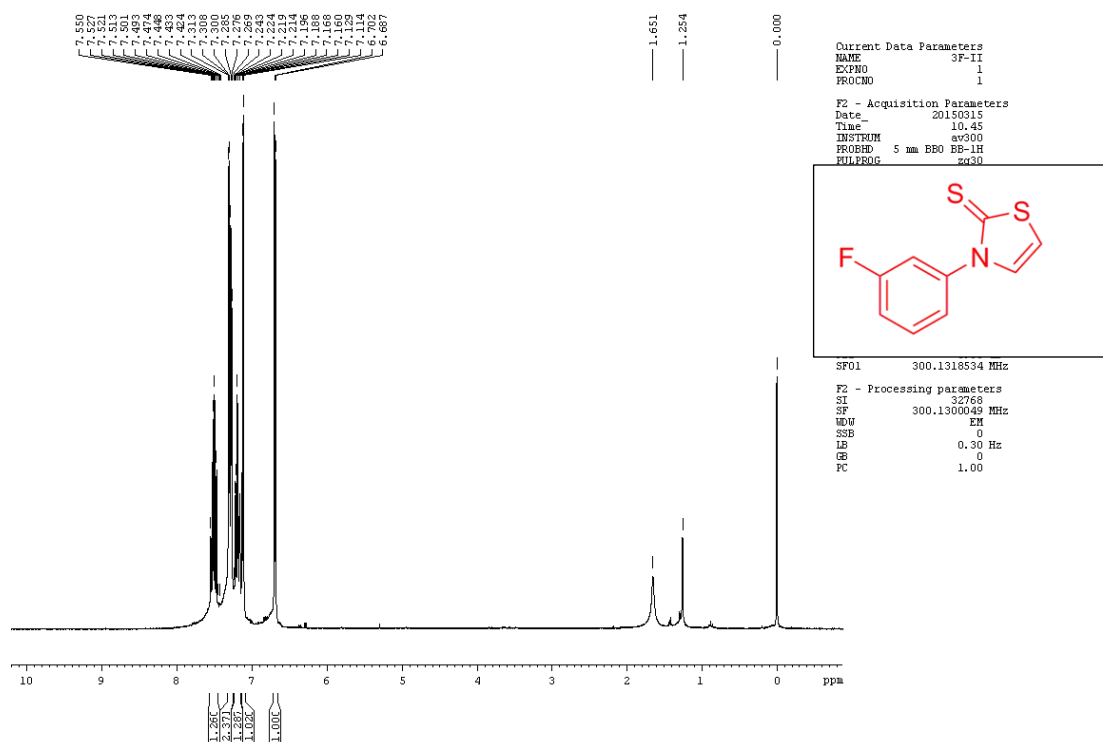

Fig.58 <sup>1</sup>H NMR Spectrum 6d(CDCl<sub>3</sub>)

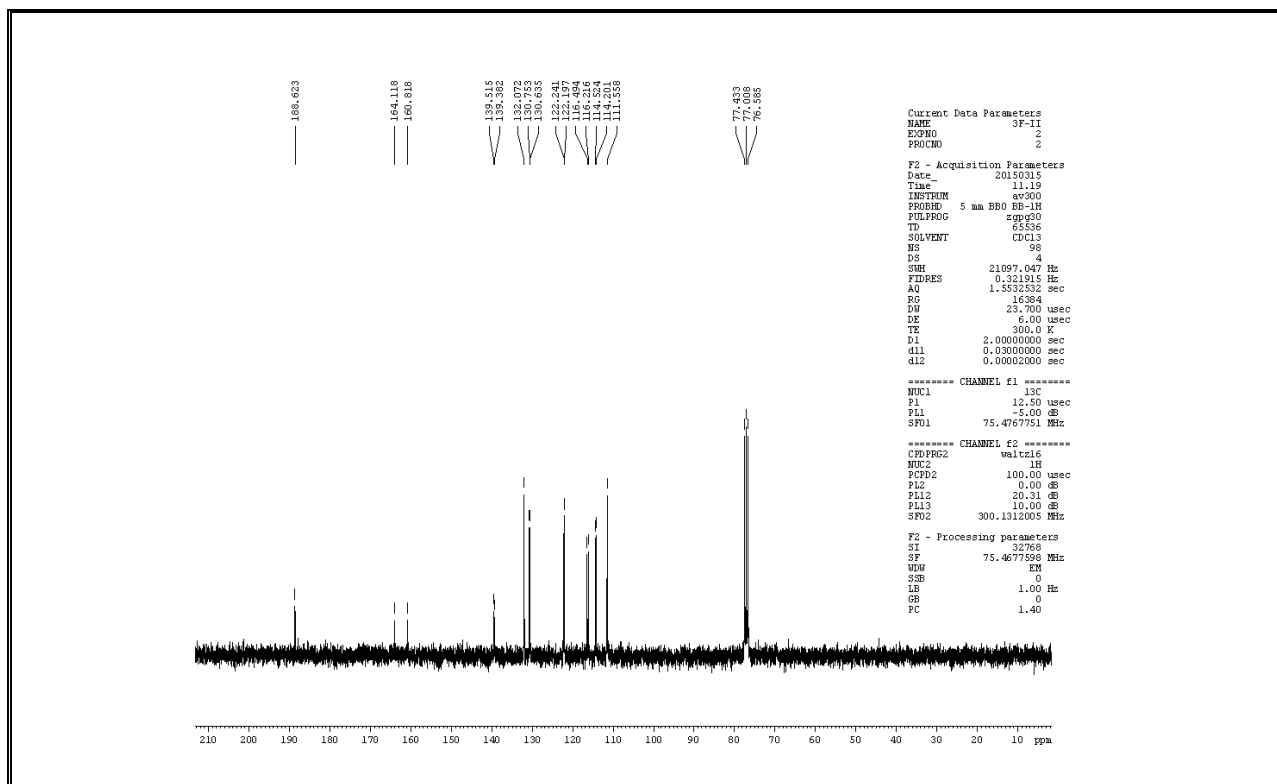

Fig.59  $^{13}\text{C}$  NMR Spectrum of **6d**( $\text{CDCl}_3$ )

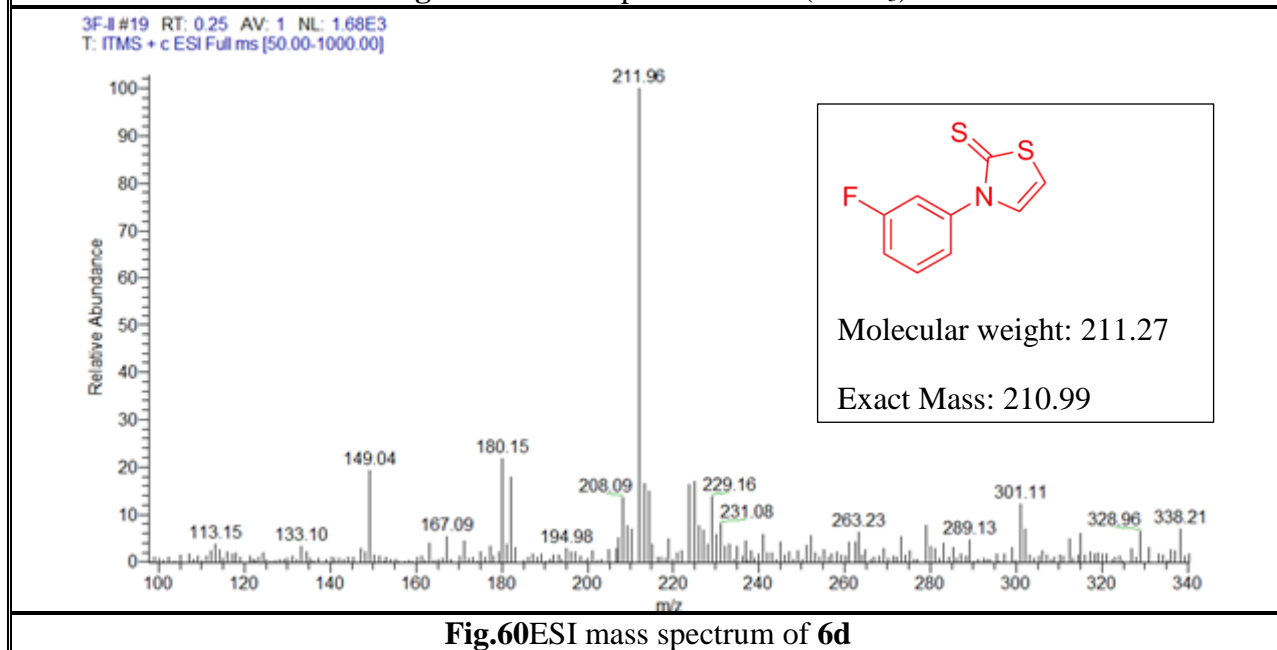

Fig.60 ESI mass spectrum of **6d**

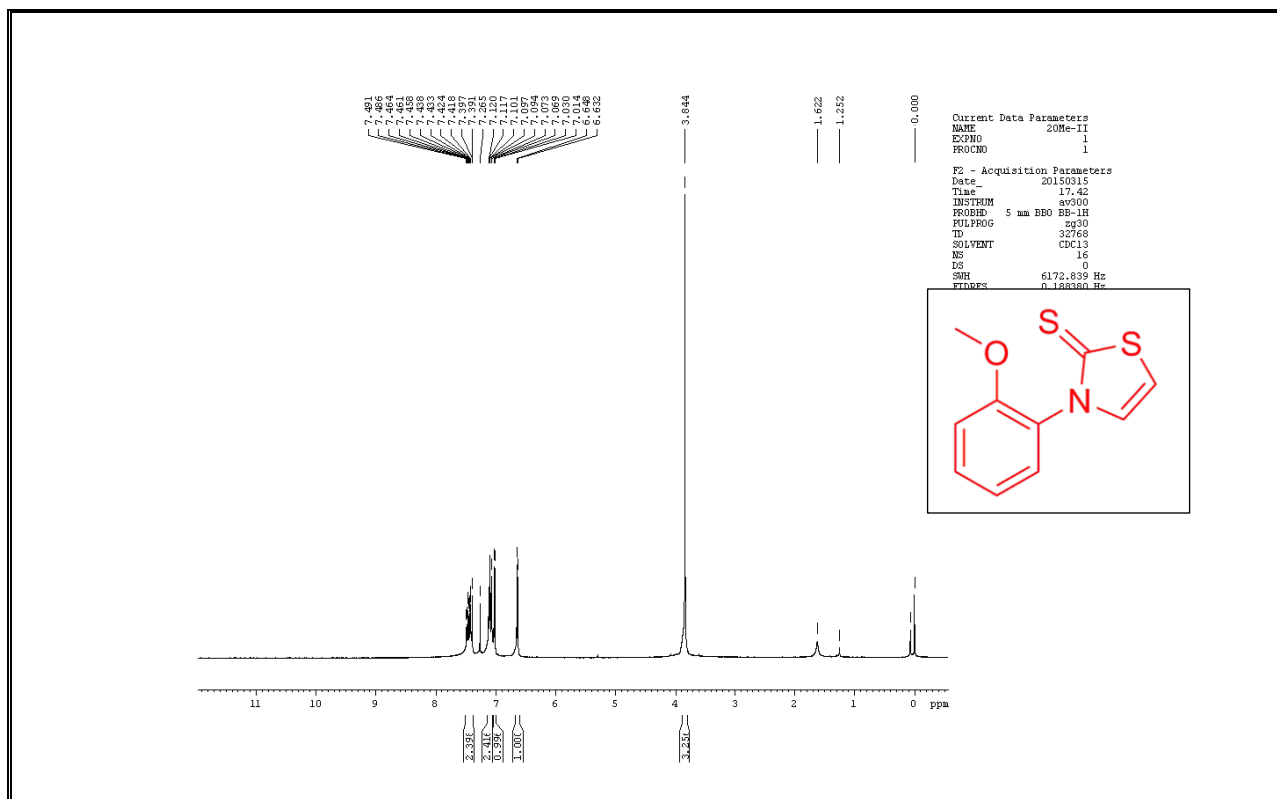

Fig.61 <sup>1</sup>H NMR Spectrum 6e(CDCl<sub>3</sub>)

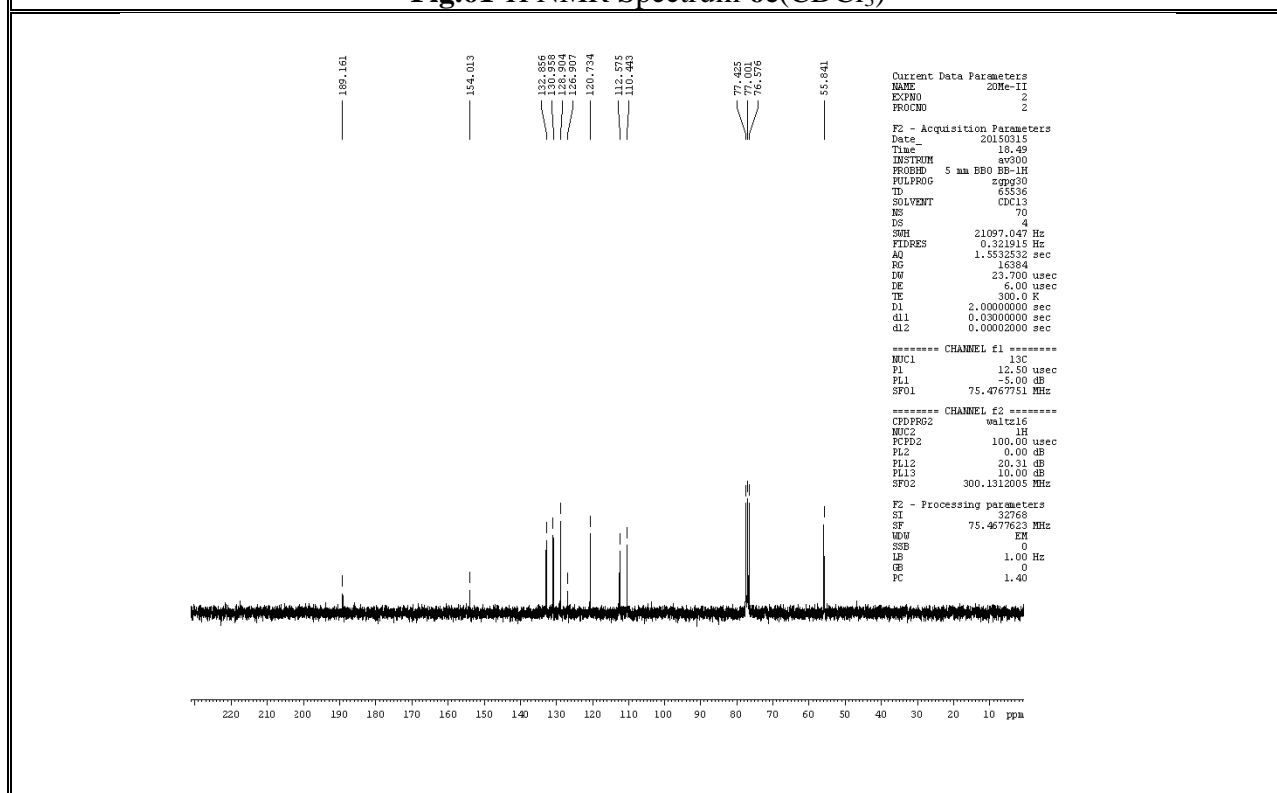

Fig.62 <sup>13</sup>C NMR Spectrum of 6e(CDCl<sub>3</sub>)
